# Supplementary material for: Design and synthesis of dinuclear cobalt(ii) complexes derived from strong π-acidic ligands: crystal structure and studies on the oxidation of sp3 C–H bonds
Source: Royal Society of Chemistry journal article supplement (doi:10.1039/d3nj00128h), 2023-01-01
Supplement: d3nj00128h1.pdf [file d3nj00128h1.pdf]

## Supporting Information

### Design and synthesis of dinuclear cobalt(II) complexes derived from strong $\pi$ -acidic ligands: crystal structure and studies on the oxidation of $sp^3$ C–H bond

Anshu Singh, Bishal Boro, Ankur Maji, Ovender Singh, Sain Singh, U.P. Singh and Kaushik Ghosh <sup>a\*</sup>

<sup>a</sup>Department of Chemistry, Indian Institute of Technology Roorkee, Roorkee-247667 Uttarakhand, India  
E-mail: kaushik.ghosh@cy.iitr.ac.in, ghoshfcy@iitr.ac.in, Tel (91)01332-285547, Fax: (91) 01332- 273560.

#### Table of Contents

|           |                                                                                                                                               |
|-----------|-----------------------------------------------------------------------------------------------------------------------------------------------|
| 1.        | Comparison of bond lengths of crystal structure.                                                                                              |
| 2.        | Data comparison with literature for the oxidation of different substrates.                                                                    |
| Fig. S1   | <sup>1</sup> H NMR spectrum of L <sup>1</sup> taking CDCl <sub>3</sub> as solvent.                                                            |
| Fig. S2   | <sup>13</sup> C NMR spectrum of L <sup>1</sup> taking CDCl <sub>3</sub> as solvent.                                                           |
| Fig. S3   | <sup>1</sup> H NMR spectrum of L <sup>2</sup> taking DMSO as solvent.                                                                         |
| Fig. S4   | <sup>13</sup> C NMR spectrum of L <sup>2</sup> taking DMSO as solvent.                                                                        |
| Fig. S5   | Electronic absorption spectra of ligands L <sup>1</sup> and complex <b>1</b> in dichloromethane solution.                                     |
| Fig. S6   | Electronic absorption spectra of ligands L <sup>2</sup> and complex <b>2</b> in dichloromethane solution.                                     |
| Table S1  | Characteristic UV-visible spectroscopic data for ligands (L <sup>1</sup> and L <sup>2</sup> ) and their cobalt (II) complexes ( <b>1-2</b> ). |
| Fig. S7   | FT-IR spectrum of free ligand L <sup>1</sup> .                                                                                                |
| Fig. S8   | FT-IR spectrum of free ligand L <sup>2</sup> .                                                                                                |
| Fig. S9   | FT-IR spectrum of complex <b>1</b> .                                                                                                          |
| Fig. S10  | FT-IR spectrum of complex <b>2</b> .                                                                                                          |
| Fig. S11  | ESI-MS Spectrum of L <sup>1</sup> using acetonitrile as solvent.                                                                              |
| Fig. S12  | ESI-MS Spectrum of L <sup>2</sup> using acetonitrile as solvent.                                                                              |
| Fig. S13  | ESI-MS spectra of complex <b>1</b> using acetonitrile as solvent.                                                                             |
| Fig. S14  | ESI-MS spectra of complex <b>2</b> using acetonitrile as solvent.                                                                             |
| Table S2  | Crystal data and structural refinement parameters for complex <b>1</b> .                                                                      |
| Table S3  | Selected bond angles and bond distances of complex <b>1</b> .                                                                                 |
| Scheme S1 | Oxidation of fluorene.                                                                                                                        |
| Table S4  | Oxidation of fluorene using different type complexes ( <b>1-2</b> )                                                                           |
| Fig. S15  | Oxidation of fluorene using different type complexes ( <b>1-2</b> )                                                                           |
| Table S5  | Effect of different oxidants on the oxidation of fluorene using <b>Complex 1</b> .                                                            |
| Fig. S16  | Effect of different oxidants on the oxidation of fluorene using <b>Complex 1</b>                                                              |
| Table S6  | Varying amount of <b>Complex 1</b> .                                                                                                          |

|                     |                                                                                             |
|---------------------|---------------------------------------------------------------------------------------------|
| <b>Fig. S17</b>     | Varying amount of <b>Complex 1</b> .                                                        |
| <b>Table S7</b>     | Varying amount of oxidant TBHP with constant amount of <b>Complex 1</b> .                   |
| <b>Fig. S18</b>     | Varying amount of oxidant TBHP with constant amount of <b>Complex 1</b> .                   |
| <b>Table S8</b>     | Effect of temperature on the oxidation of fluorene using <b>Complex 1</b> .                 |
| <b>Fig. S19</b>     | Effect of temperature on the oxidation of fluorene using <b>Complex 1</b> .                 |
| <b>Table S9</b>     | Effect of solvent on the oxidation of fluorene using <b>Complex 1</b> .                     |
| <b>Fig. S20</b>     | Effect of solvent on the oxidation of fluorene using <b>Complex 1</b> .                     |
| <b>Table S10</b>    | Oxidation of fluorene at different time using <b>Complex 1</b> .                            |
| <b>Fig. S21</b>     | Oxidation of fluorene at different time using <b>Complex 1</b> .                            |
| <b>Fig. S22-S37</b> | $^1\text{H}$ NMR and $^{13}\text{C}$ NMR spectrum of 1-8 taking $\text{CDCl}_3$ as solvent. |
| <b>Table S11</b>    | Data analysis for oxidation of cyclohexane <sup>a</sup>                                     |
| <b>Table S12</b>    | Data analysis for oxidation of phenylacetonitrile <sup>a</sup>                              |
| <b>Table S13</b>    | Data analysis for oxidation of 9,10-dihydroanthracene <sup>a</sup>                          |
| <b>Table S14</b>    | Data analysis for oxidation of adamantane <sup>a</sup>                                      |
| <b>Fig. S38</b>     | GC-MS spectra for oxidation of cyclohexane.                                                 |
| <b>Fig. S39</b>     | GC-MS spectra for oxidation of phenylacetonitrile.                                          |
| <b>Fig. S40</b>     | GC-MS spectra for oxidation of 9,10-dihydro anthracene.                                     |
| <b>Fig. S41</b>     | GC-MS spectra for oxidation of adamantane.                                                  |
| <b>Fig. S42</b>     | Packing diagram of complex <b>1</b> (projection at $c^*$ -axis).                            |
| <b>Table S15</b>    | Comparative study of literature for the oxidation of different alkanes                      |

## 1. Comparison of bond lengths of crystal structure

For complex **1** Co1A–N<sub>py</sub> is close to the 2.043(1) Å. The bond length Co1A–N<sub>py</sub> of complex **1** is in good agreement with our previous reported values<sup>1</sup> and Qian Co-workers<sup>2</sup>, but smaller than the values reported by Nayab and co-workers<sup>3</sup> and larger than the values reported by Batisa and co-workers.<sup>4</sup> Co1A–N<sub>im</sub> is close to 2.2008(9) Å. The bond length Co1A–N<sub>im</sub> of complex **1** is smaller than our previous reported values Qian and co-workers<sup>2</sup> and larger than the values reported by Batisa and co-workers. Co1A–Cl1A and Co1A–Cl2A is close to the 2.2867(3) Å and 2.3064(4) Å is in good agreement with our previous reported value<sup>5</sup> and Nayab and co-workers<sup>6</sup> but smaller than the values reported by Batisa and co-workers.<sup>4</sup> Qian and co-workers.<sup>2</sup> Co1A–O1A is close to the 2.0842(9) Å is in good agreement with Ali and co-workers<sup>7</sup> but smaller than the values reported by Jacewicz and co-workers.<sup>8</sup> The bond length of complex **1** were consistent with reported data of high spin Co(II) complexes.<sup>5</sup>

## 2. Data comparison with literature for the oxidation of different substrates

We compared the catalytic activity in the light of the reported literature. In our study, catalyst **1** provided the best result for the oxidation of sp<sup>3</sup> C–H bond under optimized reaction condition. Results obtained after catalysis were compared with the literature reports (shown in Table S15). The product formation for fluorene and diphenyl methane was excellent (80%) for catalysts **1–2** and it was efficient as compared to literature reports<sup>9,10</sup> whereas less efficient for the catalytic oxidation of adamantane as compared to previous reports.<sup>11</sup> The product formation were good (>73%) for ethyl benzene as well as substituted ethyl benzene compared to previous literature reports.<sup>12</sup> Catalyst **1-2** showed good catalytic activity for cyclohexane and tetralin compared to other reports.<sup>13-14</sup> Thus, the present complexes may be placed among good catalysts known for oxidation of benzylic as well as aliphatic sp<sup>3</sup> C–H bond.

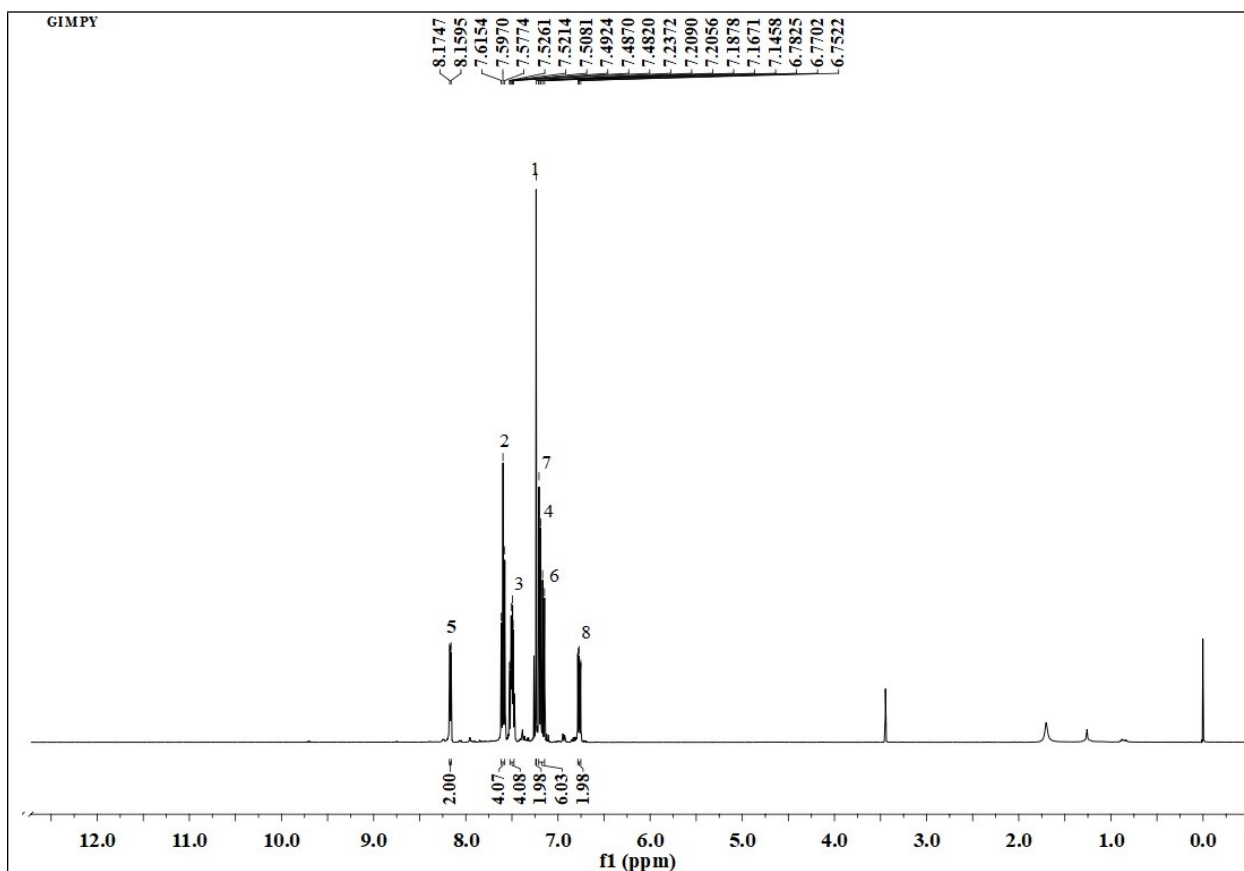

**Fig. S1.**  $^1\text{H}$  NMR spectrum of  $\text{L}^1$  taking  $\text{CDCl}_3$  as solvent.

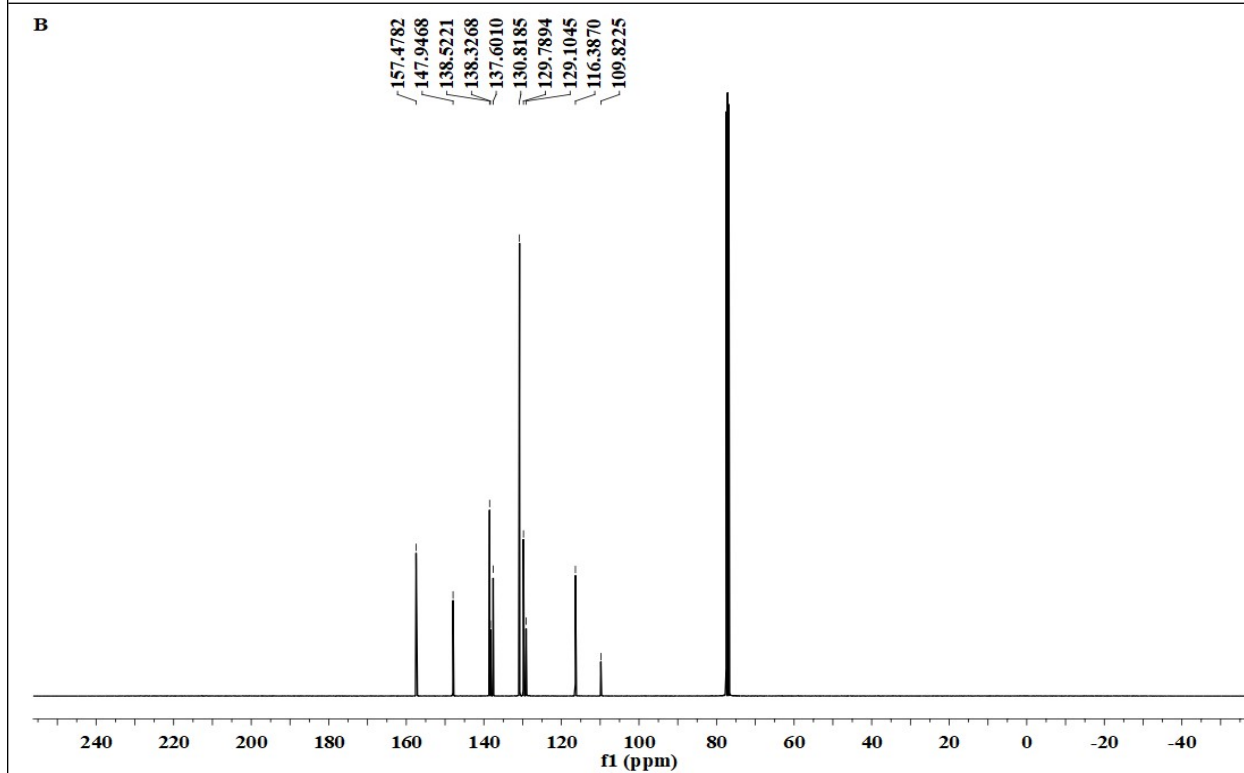

**Fig. S2.**  $^{13}\text{C}$  NMR spectrum of  $\text{L}^1$  taking  $\text{CDCl}_3$  as solvent.

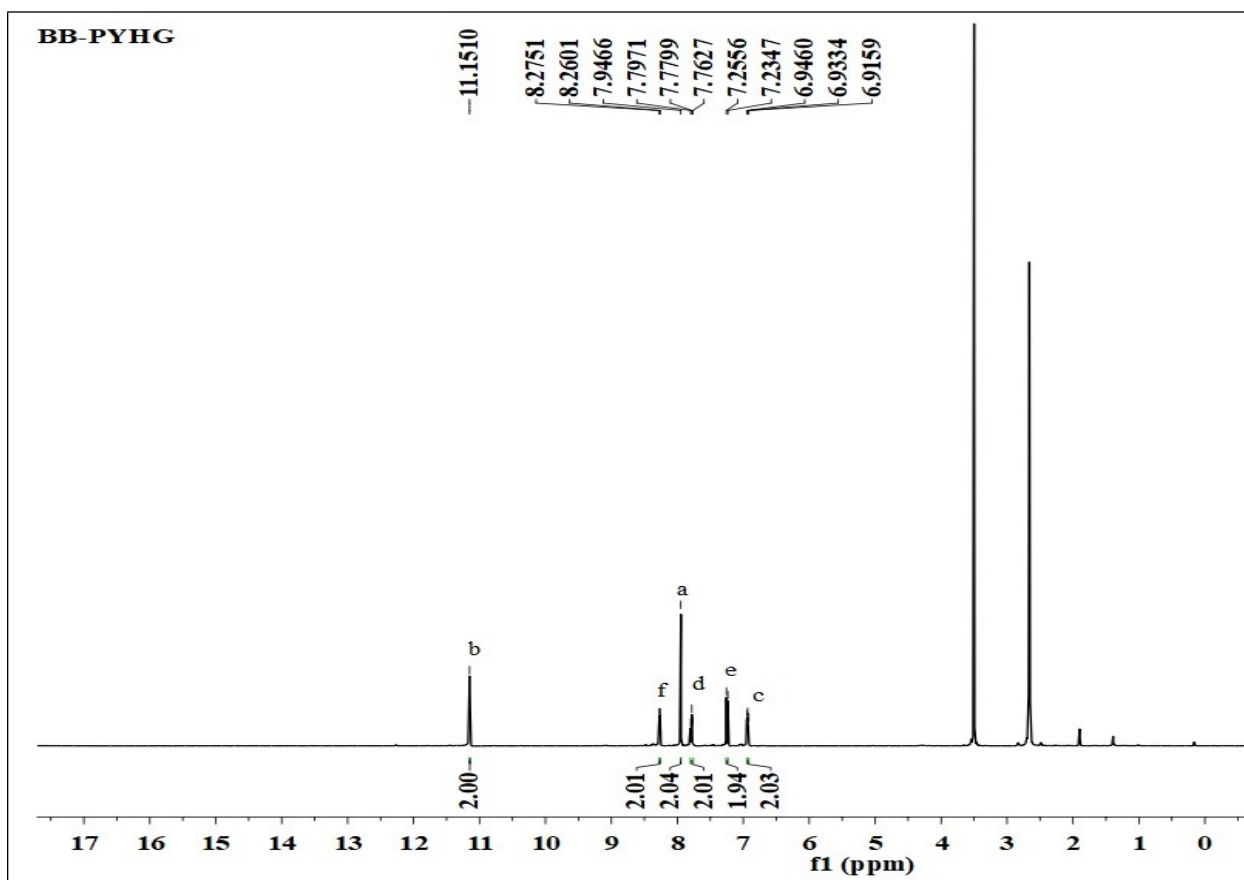

**Fig. S3.**  $^1\text{H}$  NMR spectrum of  $\text{L}^2$  taking DMSO as solvent.

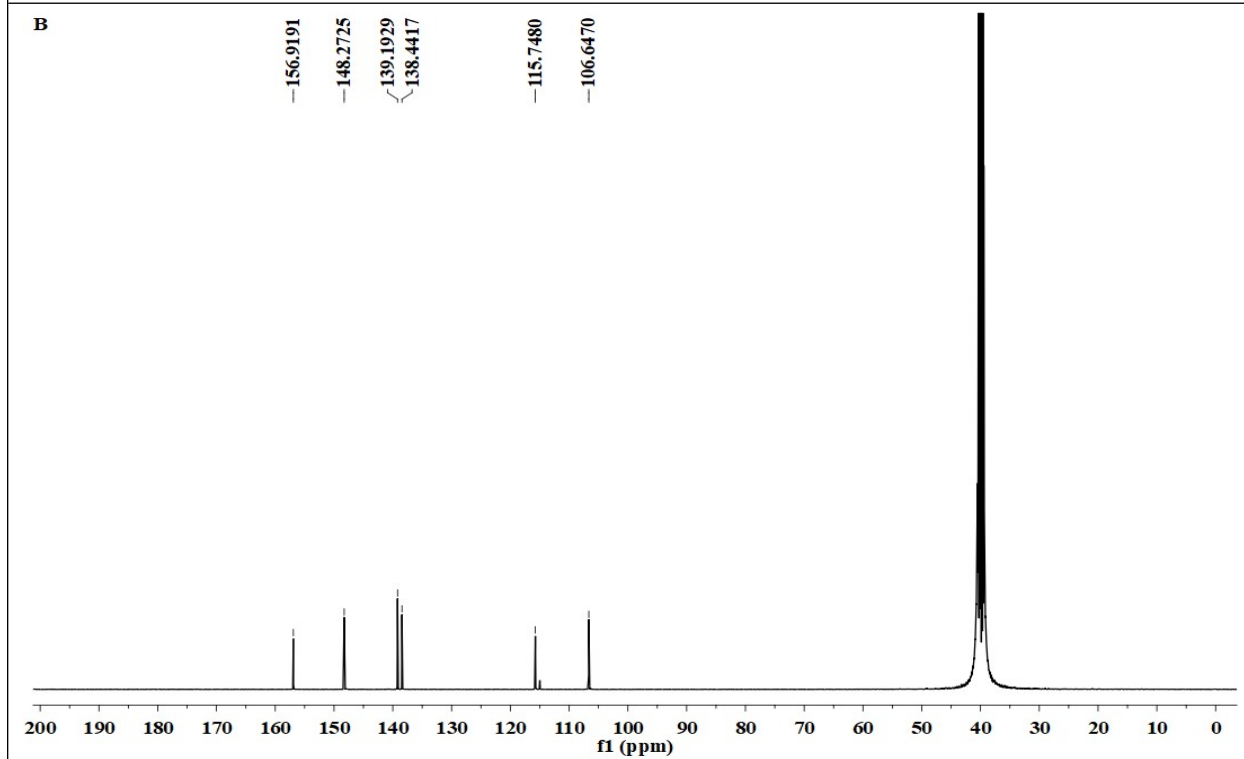

**Fig. S4.**  $^{13}\text{C}$  NMR spectrum of  $\text{L}^2$  taking DMSO as solvent.

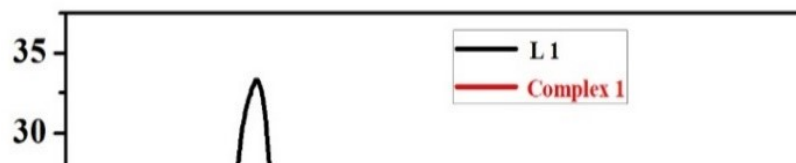

**Fig. S5.** Electronic absorption spectra of ligands  $L^1$  and complex **1** in dichloromethane solution.

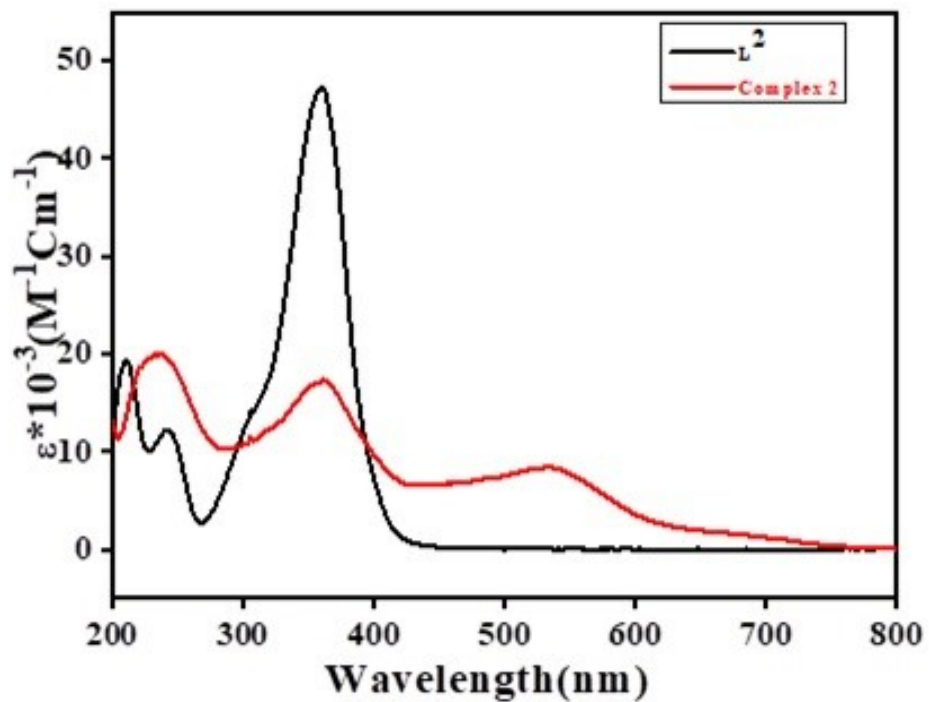

**Fig. S6.** Electronic absorption spectra of ligands  $L^2$  and complex **2** in dichloromethane solution.

**Table S1:** Characteristic UV-visible spectroscopic data for ligands ( $L^1$  and  $L^2$ ) and their cobalt (II) complexes (**1-2**).

| Entry | Compound         | $\lambda_{\max}$ (nm) | $\epsilon$ ( $M^{-1}cm^{-1}$ ) |
|-------|------------------|-----------------------|--------------------------------|
| 1     | $L^1$            | 227, 284, 361         | 11237, 7775, 33325             |
| 2     | $L^2$            | 210, 241, 358         | 18257, 12536, 45525            |
| 3     | Complex <b>1</b> | 235, 304, 415         | 5100, 3037, 3450               |
| 4     | Complex <b>2</b> | 245, 362, 515         | 19452, 15650, 9650             |

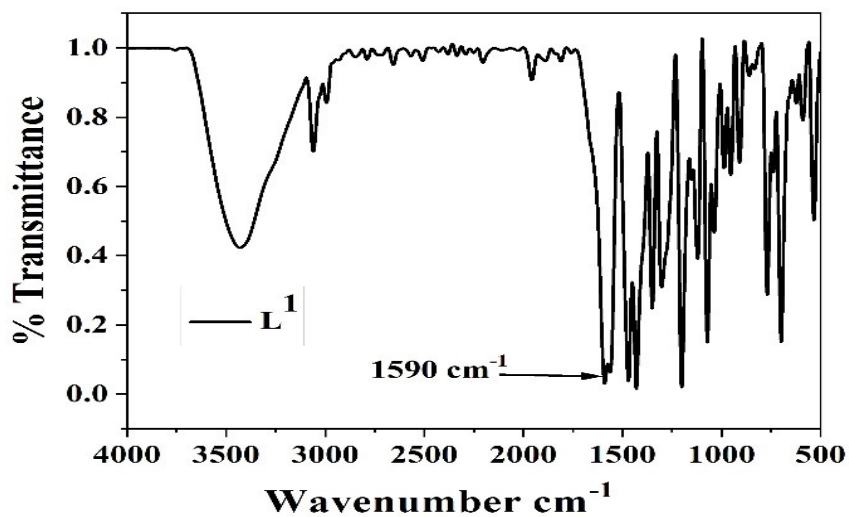

Fig. S7. FT-IR spectrum of free ligand L<sup>1</sup>.

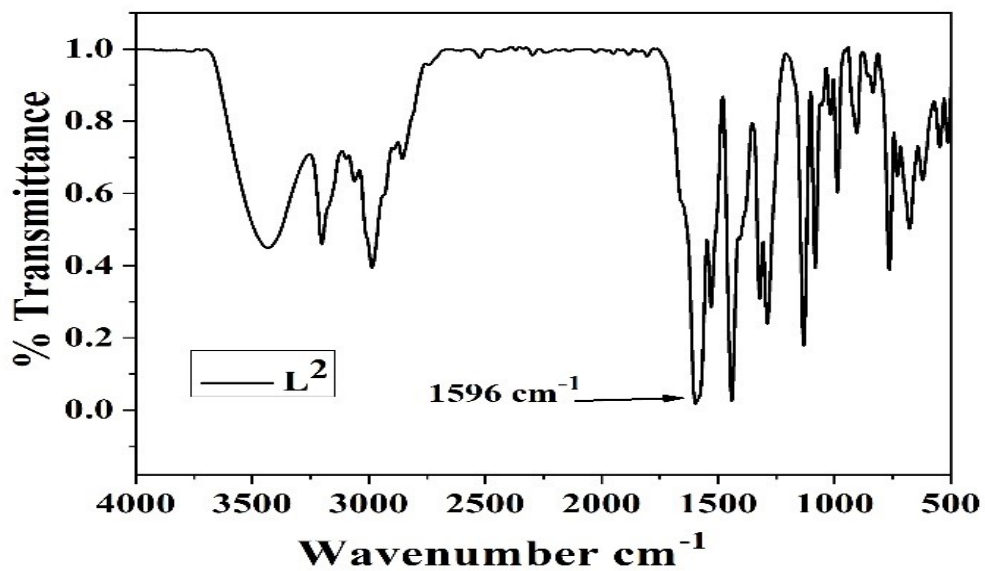

Fig. S8. FT-IR spectrum of free ligand L<sup>2</sup>.

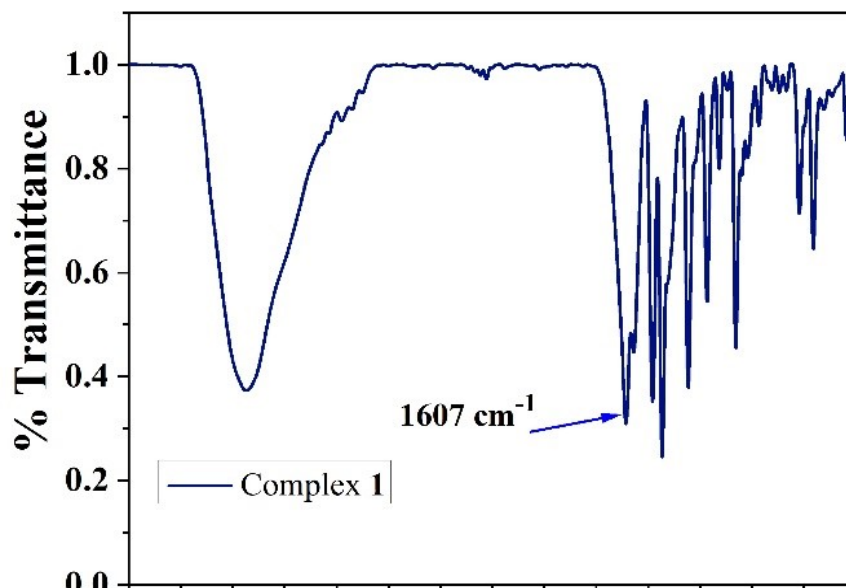

Fig. S9. FT-IR spectrum of complex 1.

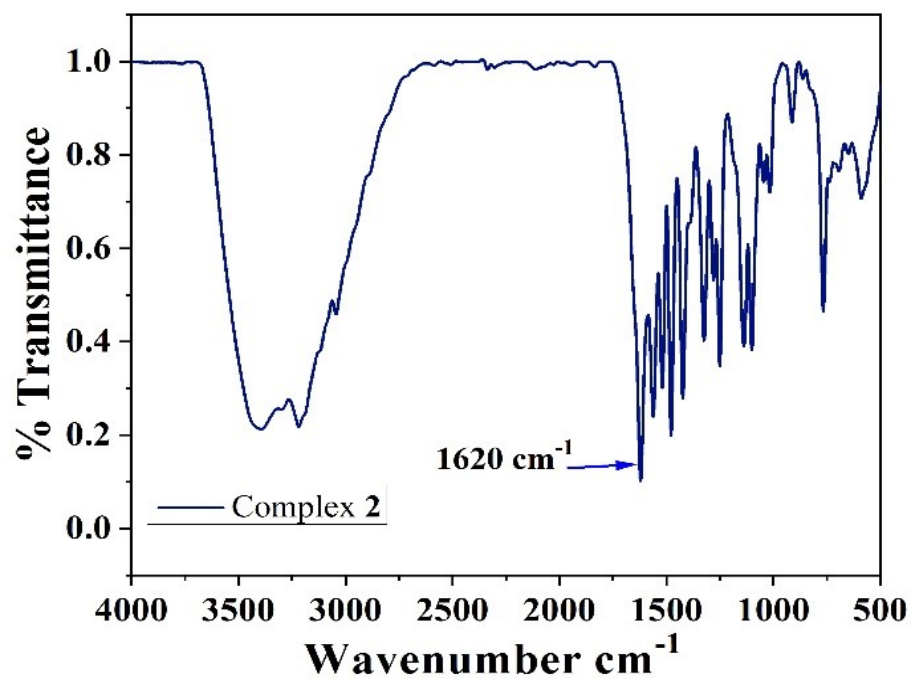

Fig. S10. FT-IR spectrum of complex 2.

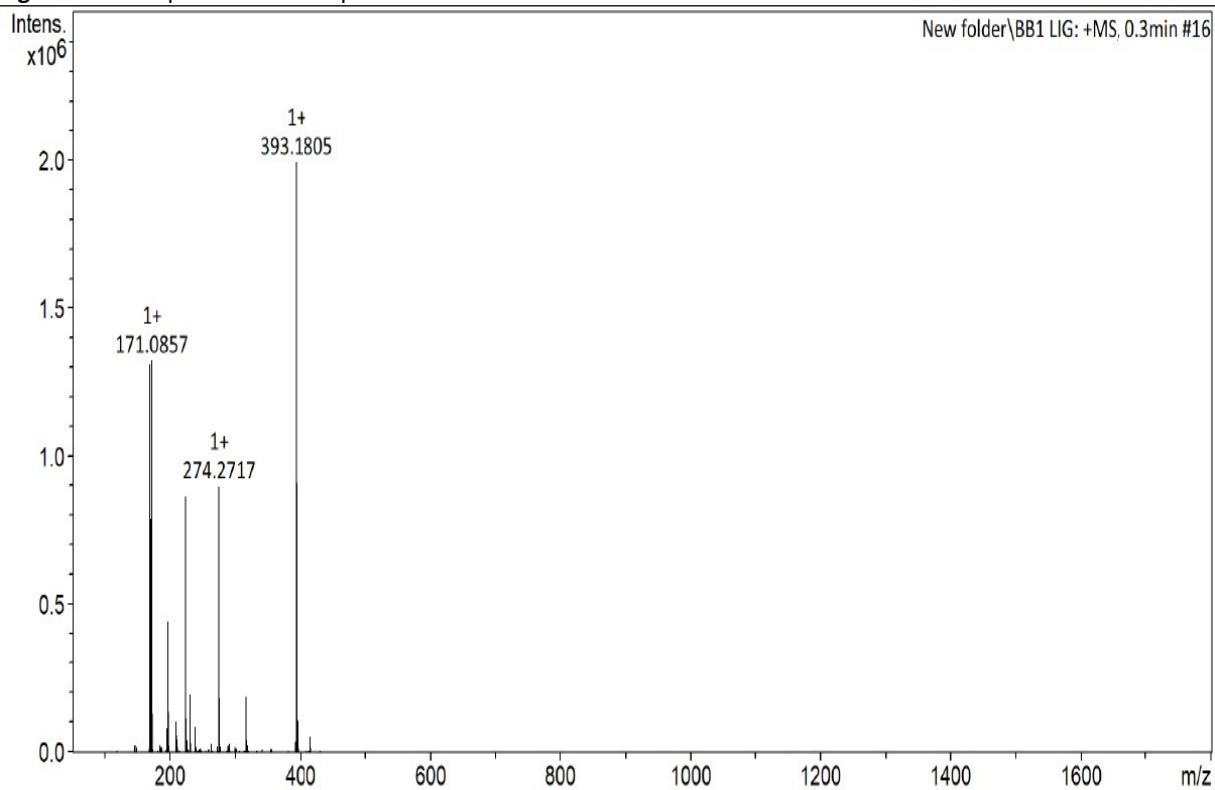

Fig. S11. ESI-MS Spectrum of L<sup>1</sup> using acetonitrile as solvent.



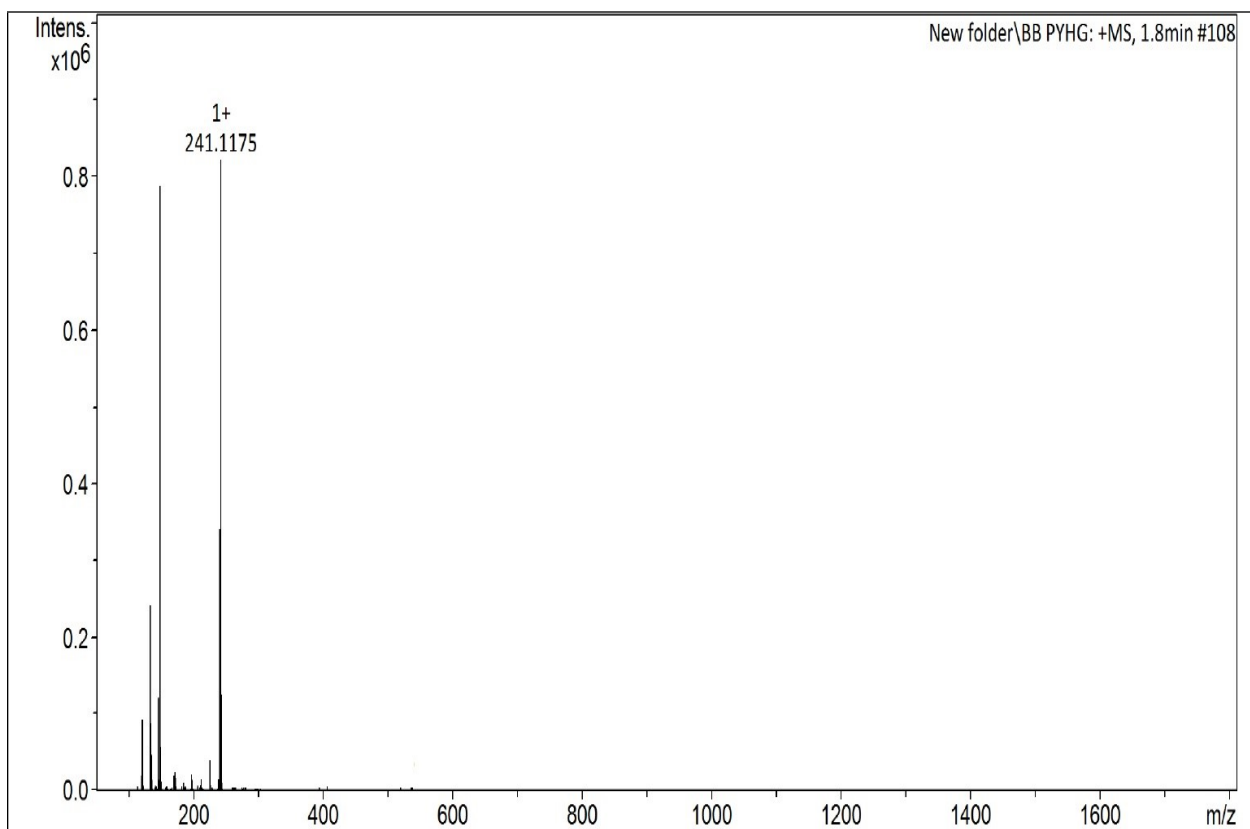

**Fig. S12.** ESI-MS Spectrum of L<sup>2</sup> using acetonitrile as solvent.

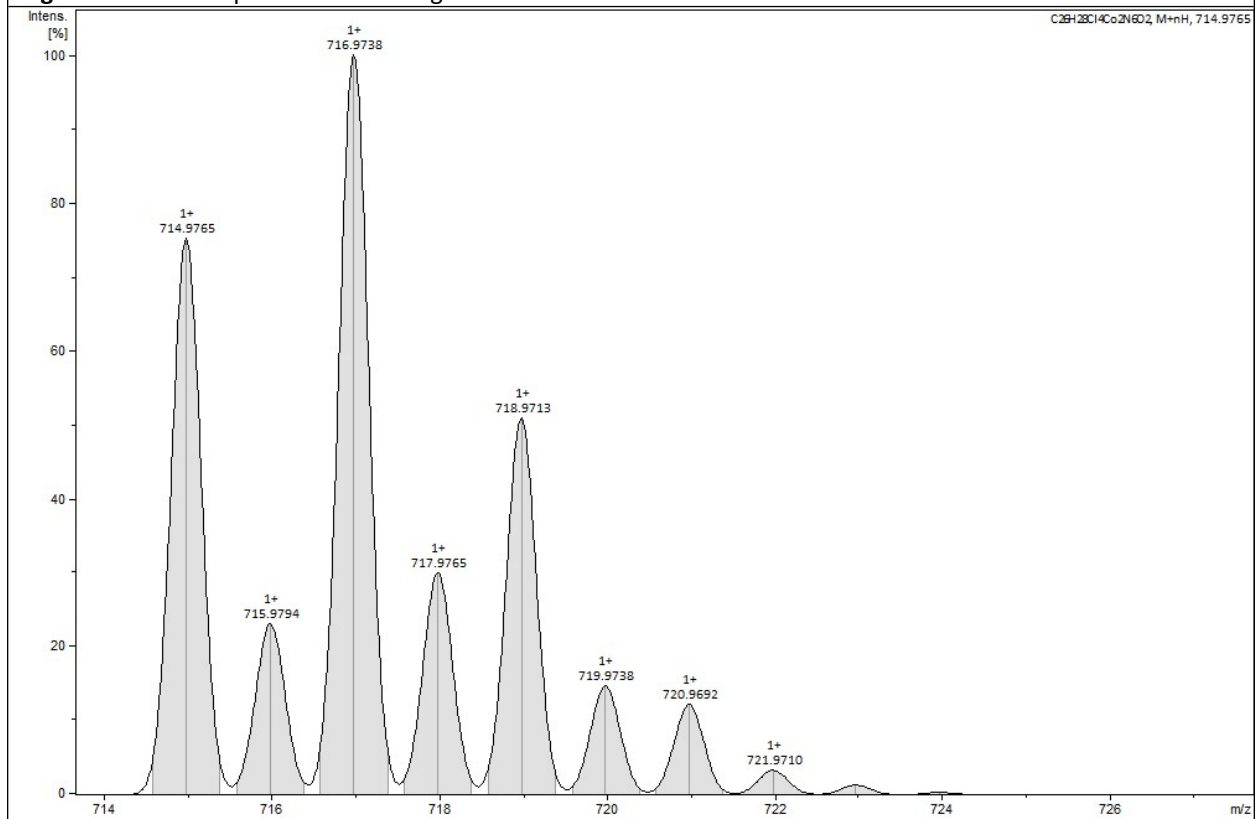

**Fig. S13.** ESI-MS spectra of complex **1** using acetonitrile as solvent.

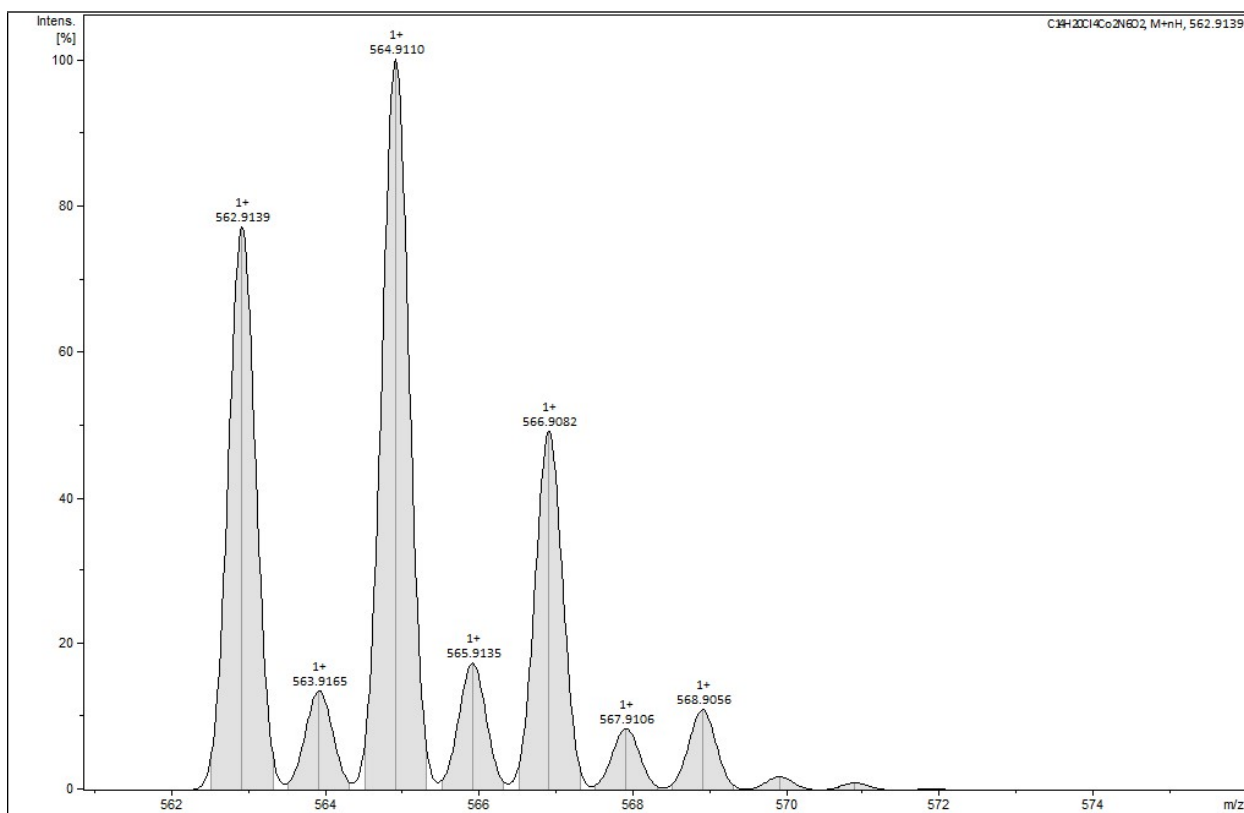

**Fig. S14.** ESI-MS spectra of complex **2** using acetonitrile as solvent.

**Table S2:** Crystal data and structural refinement parameters for complex **1**

| <b>Empirical formula</b>           | <b>C<sub>26</sub>Cl<sub>4</sub>Co<sub>2</sub>N<sub>8</sub>HO</b> |
|------------------------------------|------------------------------------------------------------------|
| Formula weight                     | 716.20                                                           |
| Temperature/K                      | 100.0                                                            |
| Color                              | Metallic                                                         |
| Crystal system                     | triclinic                                                        |
| Space group                        | P-1                                                              |
| a/Å                                | 9.1270(3)                                                        |
| b/Å                                | 9.5751(3)                                                        |
| c/Å                                | 9.8287(3)                                                        |
| α/°                                | 65.8370(10)                                                      |
| β/°                                | 70.6870(10)                                                      |
| γ/°                                | 89.6210(10)                                                      |
| Volume/Å <sup>3</sup>              | 731.27(4)                                                        |
| Z                                  | 1                                                                |
| ρ <sub>calc</sub> /cm <sup>3</sup> | 1.626                                                            |
| μ/mm <sup>-1</sup>                 | 1.536                                                            |
| F(000)                             | 364.0                                                            |
| Crystal size/mm <sup>3</sup>       | 0.177 × 0.051 × 0.021                                            |
| Radiation                          | MoKα (λ = 0.71073)                                               |
| 2θ range for data collection/°     | 4.716 to 61.248                                                  |
| Index ranges                       | -13 ≤ h ≤ 13, -13 ≤ k ≤ 13, -14 ≤ l ≤ 14                         |
| Reflections collected              | 36244                                                            |
| Independent reflections            | 4500 [R <sub>int</sub> = 0.0299, R <sub>sigma</sub> = 0.0164]    |
| Data/restraints/parameters         | 4500/3/185                                                       |

|                                                                                                                                                                                                                                                                                        |                                                   |
|----------------------------------------------------------------------------------------------------------------------------------------------------------------------------------------------------------------------------------------------------------------------------------------|---------------------------------------------------|
| Goodness-of-fit on F <sup>2</sup>                                                                                                                                                                                                                                                      | 1.065                                             |
| Final R indexes [ $l \geq 2\sigma(l)$ ]                                                                                                                                                                                                                                                | R <sub>1</sub> = 0.0245, wR <sub>2</sub> = 0.0630 |
| Final R indexes [all data]                                                                                                                                                                                                                                                             | R <sub>1</sub> = 0.0262, wR <sub>2</sub> = 0.0644 |
| Largest diff. peak/hole / e Å <sup>-3</sup>                                                                                                                                                                                                                                            | 0.65/-0.29                                        |
| <sup>a</sup> GOF = $[\sum[w(F_o^2 - F_c^2)^2] / (M - N)]^{1/2}$ (M = number of reflections, N = number of parameters refined). <sup>b</sup> R <sub>1</sub> = $\sum   F_o  -  F_c   / \sum  F_o $ , <sup>c</sup> wR <sub>2</sub> = $[\sum[w(F_o^2 - F_c^2)_2] / \sum [w(F_o)_2]]^{1/2}$ |                                                   |

**Table S3:** Selected bond distances and bond angles of complex 1

| Bond Lengths (Å) |           | Bond Angles(°) |           |
|------------------|-----------|----------------|-----------|
| Co1A—Cl1A        | 2.2867(3) | Cl1A—Co1A—Cl2A | 130.07(1) |
| Co1A—Cl2A        | 2.3064(4) | O1A—Co1A—Cl1A  | 94.55(3)  |
| Co1A—O1A         | 2.0842(9) | N2 —Co1A —Cl1A | 86.42(3)  |
| Co1A—N2          | 2.2008(9) | Cl1A—Co1A —N1  | 111.04(3) |
| Co1A—N1          | 2.043(1)  | Cl2A—Co1A —O1A | 90.01(3)  |
|                  |           | Cl2A—Co1A —N2  | 93.75(3)  |
|                  |           | Cl2A —Co1A —N1 | 117.38(3) |
|                  |           | O1A —Co1A —N2  | 174.19(4) |
|                  |           | O1A —Co1A —N1  | 98.38(4)  |
|                  |           | N2 —Co1A —N1   | 75.95(4)  |

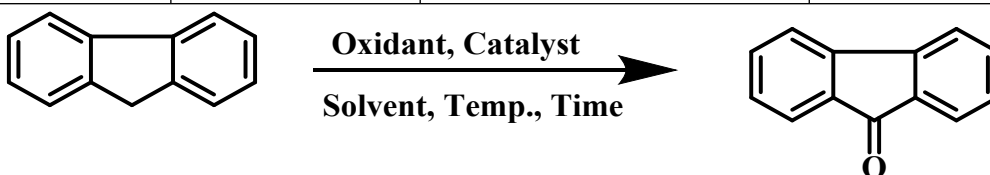

**Scheme S1:** Oxidation of fluorene

<sup>a</sup>All reactions were carried out in CH<sub>3</sub>CN at 60 °C. **Catalysts** (0.04 mmol), alkanes (1 mmol), and TBHP (8 mmol).

<sup>b</sup>TON = mmol of product/mmol of catalyst loading

<sup>c</sup>TOF = TON / time (in hours).

**Table S4:** Oxidation of fluorene using different type complexes (1-2)

| Complex                                                                                       | % Yield |
|-----------------------------------------------------------------------------------------------|---------|
| Co <sub>2</sub> (L <sup>1</sup> )(H <sub>2</sub> O) <sub>2</sub> Cl <sub>4</sub> ( <b>1</b> ) | 94      |
| Co <sub>2</sub> (L <sup>2</sup> )(H <sub>2</sub> O) <sub>2</sub> Cl <sub>4</sub> ( <b>2</b> ) | 91      |
| Ligands                                                                                       | Trace   |
| CoCl <sub>2</sub> ·6H <sub>2</sub> O                                                          | Trace   |

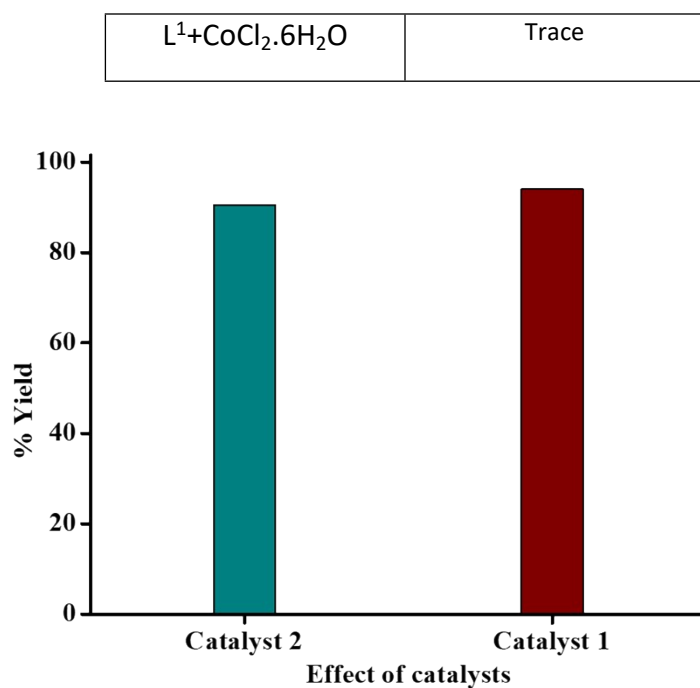

Fig. S15. Oxidation of fluorene using different type complexes (1-2)

**Table S5: Effect of different oxidants on the oxidation of fluorene using Complex 1.**

| Entry | Substrate | Amount (mmol) |           |                                   | Solvent            | % Yield |
|-------|-----------|---------------|-----------|-----------------------------------|--------------------|---------|
|       |           | Fluorene      | Complex 1 | Oxidant                           |                    |         |
| 1     | Fluorene  | 1             | 0.04      | TBHP(8)                           | CH <sub>3</sub> CN | 94      |
| 2     | Fluorene  | 1             | 0.04      | H <sub>2</sub> O <sub>2</sub> (8) | CH <sub>3</sub> CN | 41      |
| 3     | Fluorene  | 1             | 0.04      | mCPBA(8)                          | CH <sub>3</sub> CN | 20      |

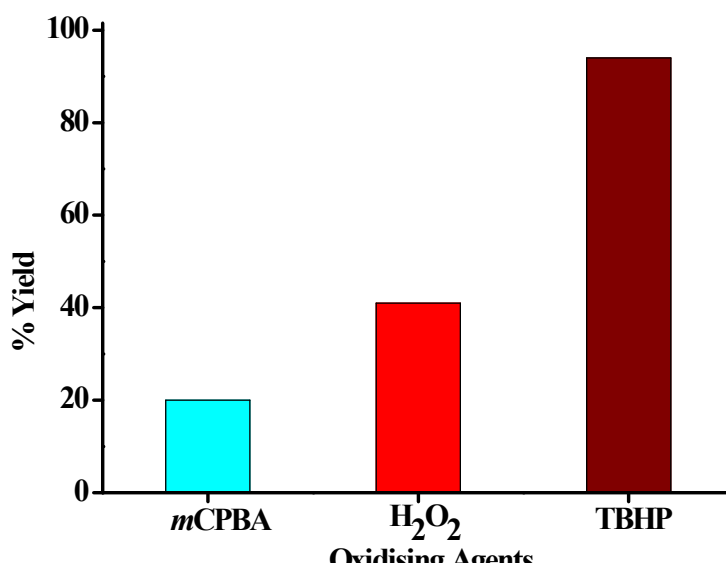

**Fig. S16.** Effect of different oxidants on the oxidation of fluorene using **Complex 1**

| <b>Table S6:</b> Varying amount of <b>Complex 1</b> . |           |               |           |      |                    |         |
|-------------------------------------------------------|-----------|---------------|-----------|------|--------------------|---------|
| Entry                                                 | Substrate | Amount (mmol) |           |      | Solvent            | % Yield |
|                                                       |           | Fluorene      | Complex 1 | TBHP |                    |         |
| 1                                                     | Fluorene  | 1             | 0.01      | 8    | CH <sub>3</sub> CN | 18%     |
| 2                                                     | Fluorene  | 1             | 0.02      | 8    | CH <sub>3</sub> CN | 42%     |
| 3                                                     | Fluorene  | 1             | 0.03      | 8    | CH <sub>3</sub> CN | 58%     |
| 4                                                     | Fluorene  | 1             | 0.04      | 8    | CH <sub>3</sub> CN | 94%     |
| 5                                                     | Fluorene  | 1             | 0.05      | 8    | CH <sub>3</sub> CN | 94%     |

**Note:** All the data was recorded after 12 h

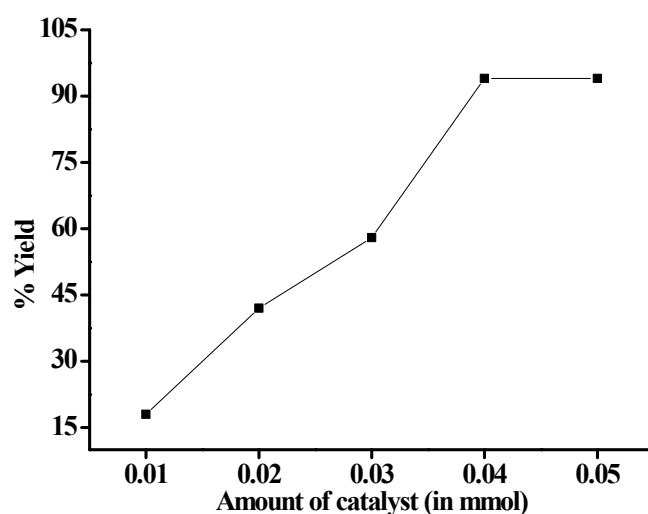

**Fig. S17.** Varying amount of **Complex 1**.

| <b>Table S7:</b> Varying amount of oxidant <b>TBHP</b> with constant amount of <b>Complex 1</b> . |           |               |           |      |                    |         |
|---------------------------------------------------------------------------------------------------|-----------|---------------|-----------|------|--------------------|---------|
| Entry                                                                                             | Substrate | Amount (mmol) |           |      | Solvent            | % Yield |
|                                                                                                   |           | Fluorene      | Complex 1 | TBHP |                    |         |
| 1                                                                                                 | Fluorene  | 1             | 0.04      | 2    | CH <sub>3</sub> CN | 15%     |
| 2                                                                                                 | Fluorene  | 1             | 0.04      | 4    | CH <sub>3</sub> CN | 34%     |
| 3                                                                                                 | Fluorene  | 1             | 0.04      | 6    | CH <sub>3</sub> CN | 72%     |
| 4                                                                                                 | Fluorene  | 1             | 0.04      | 8    | CH <sub>3</sub> CN | 94%     |
| 5                                                                                                 | Fluorene  | 1             | 0.04      | 10   | CH <sub>3</sub> CN | 94%     |

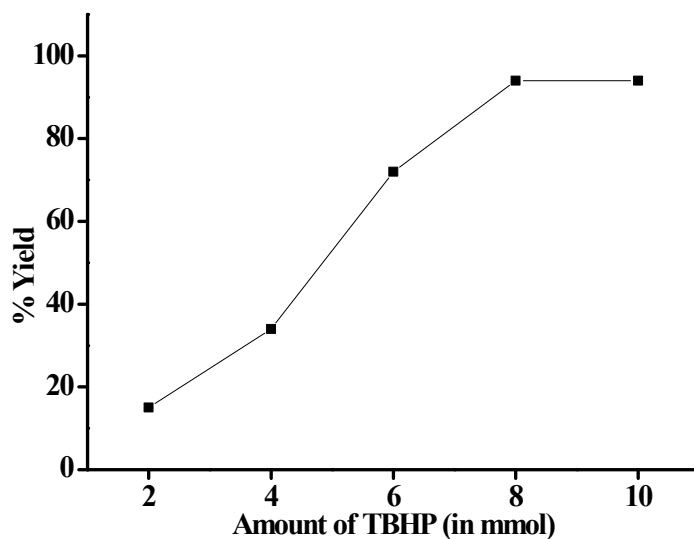

Fig. S18. Varying amount of oxidant TBHP with constant amount of Complex 1.

| Entry | Substrate | Amount (mmol) |           |      | Temp °C | % Yield |
|-------|-----------|---------------|-----------|------|---------|---------|
|       |           | Fluorene      | Complex 1 | TBHP |         |         |
| 1     | Fluorene  | 1             | 0.04      | 8    | 0       | 0       |
| 2     | Fluorene  | 1             | 0.04      | 8    | 20      | 5       |
| 3     | Fluorene  | 1             | 0.04      | 8    | 40      | 45      |
| 4     | Fluorene  | 1             | 0.04      | 8    | 60      | 61      |
| 5     | Fluorene  | 1             | 0.04      | 8    | 80      | 94      |

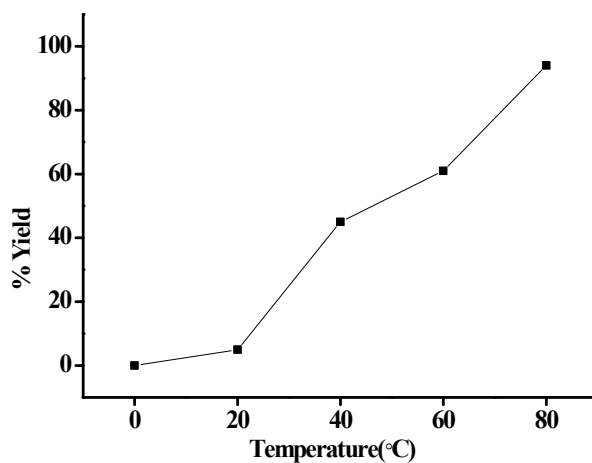

Fig. S19. Effect of temperature on the oxidation of fluorene using Complex 1

|                                                                           |
|---------------------------------------------------------------------------|
| Table S9: Effect of solvent on the oxidation of fluorene using Complex 1. |
|---------------------------------------------------------------------------|

| Entry | Substrate | Amount (mmol) |           |      | Solvent            | % Yield |
|-------|-----------|---------------|-----------|------|--------------------|---------|
|       |           | Fluorene      | Complex 1 | TBHP |                    |         |
| 1     | Fluorene  | 1             | 0.04      | 8    | CH <sub>3</sub> CN | 94      |
| 2     | Fluorene  | 1             | 0.04      | 8    | CH <sub>3</sub> OH | 20      |
| 3     | Fluorene  | 1             | 0.04      | 8    | Xylene             | 38      |
| 4     | Fluorene  | 1             | 0.04      | 8    | Benzene            | 47      |
| 5     | Fluorene  | 1             | 0.04      | 8    | Toluene            | 58      |
| 6     | Fluorene  | 1             | 0.04      | 8    | DMSO               | 52      |
| 7     | Fluorene  | 1             | 0.04      | 8    | DMF                | 42      |
| 8     | Fluorene  | 1             | 0.04      | 8    | THF                | 12      |
| 9     | Fluorene  | 1             | 0.04      | 8    | DCM                | 22      |

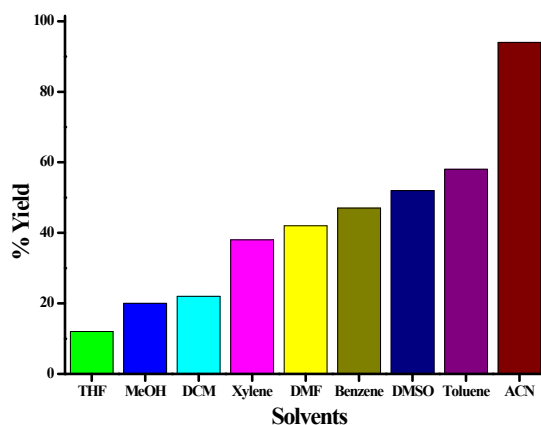

**Fig. S20.** Effect of solvent on the oxidation of fluorene using **Complex 1**.

| Entry | Substrate | Time (h) | Solvent            | % Yield |
|-------|-----------|----------|--------------------|---------|
| 1     | Fluorene  | 1        | CH <sub>3</sub> CN | 8       |
| 2     | Fluorene  | 2        | CH <sub>3</sub> CN | 12      |
| 3     | Fluorene  | 3        | CH <sub>3</sub> CN | 16      |
| 4     | Fluorene  | 4        | CH <sub>3</sub> CN | 22      |
| 5     | Fluorene  | 5        | CH <sub>3</sub> CN | 26      |
| 6     | Fluorene  | 6        | CH <sub>3</sub> CN | 32      |
| 7     | Fluorene  | 7        | CH <sub>3</sub> CN | 44      |
| 8     | Fluorene  | 8        | CH <sub>3</sub> CN | 51      |
| 9     | Fluorene  | 9        | CH <sub>3</sub> CN | 57      |
| 10    | Fluorene  | 10       | CH <sub>3</sub> CN | 72      |
| 11    | Fluorene  | 11       | CH <sub>3</sub> CN | 82      |
| 12    | Fluorene  | 12       | CH <sub>3</sub> CN | 94      |

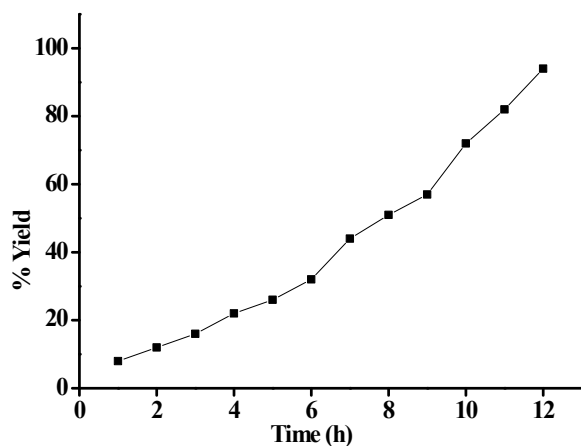

Fig. S21. Oxidation of fluorene at different time using **Complex 1**.

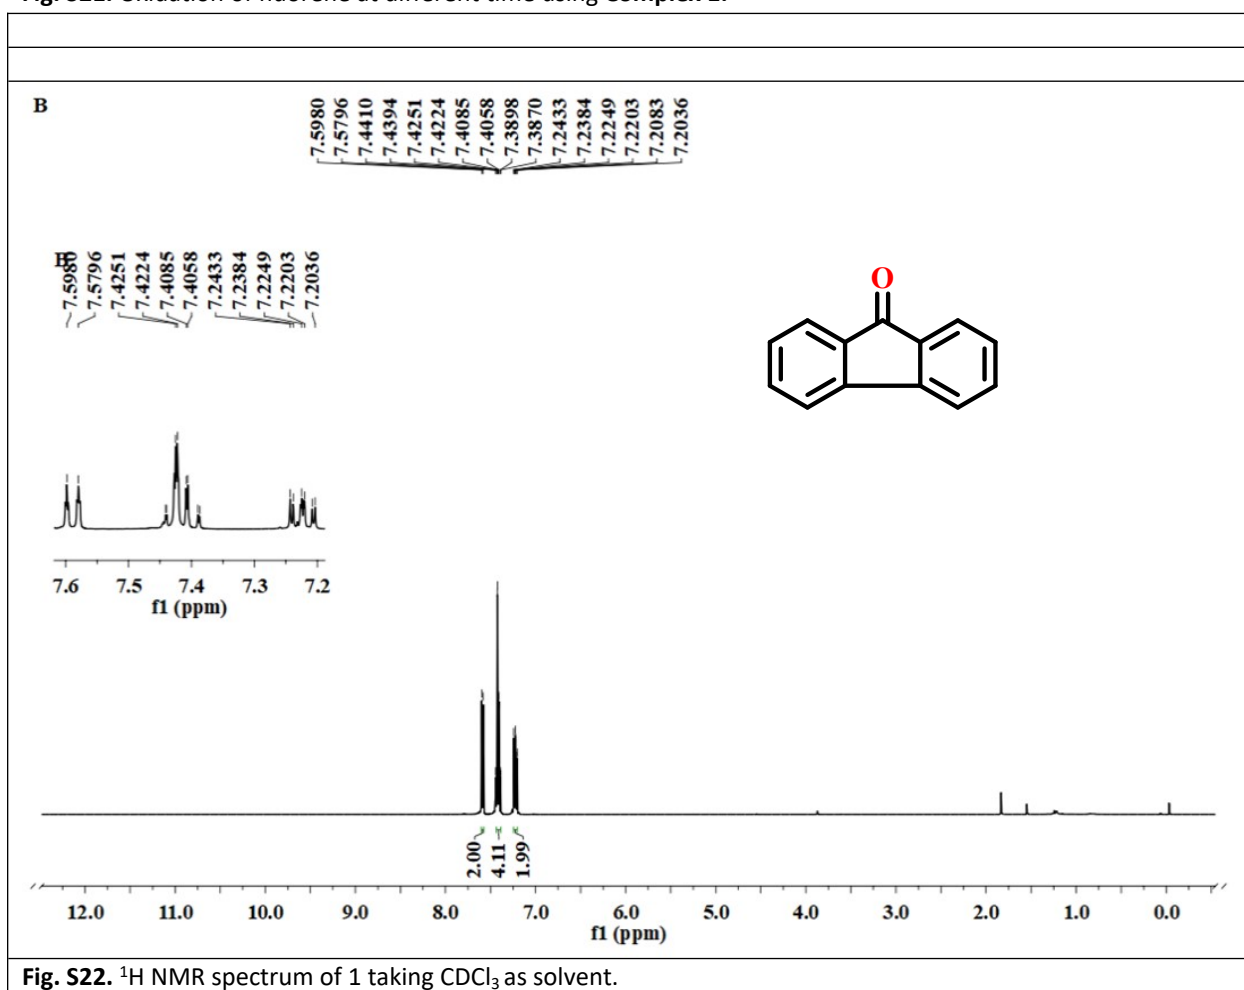

Fig. S22. <sup>1</sup>H NMR spectrum of **1** taking CDCl<sub>3</sub> as solvent.



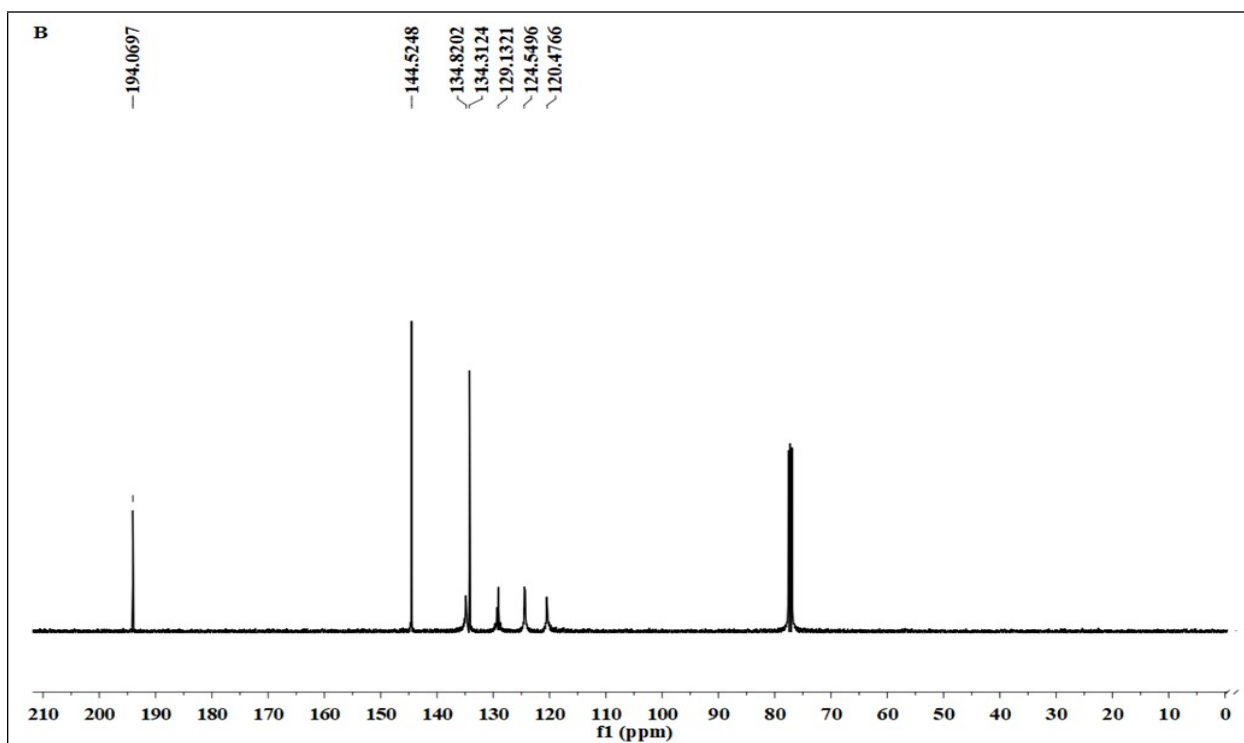

**Fig. S23.**  $^{13}\text{C}$  NMR spectrum of 1 taking  $\text{CDCl}_3$  as solvent.

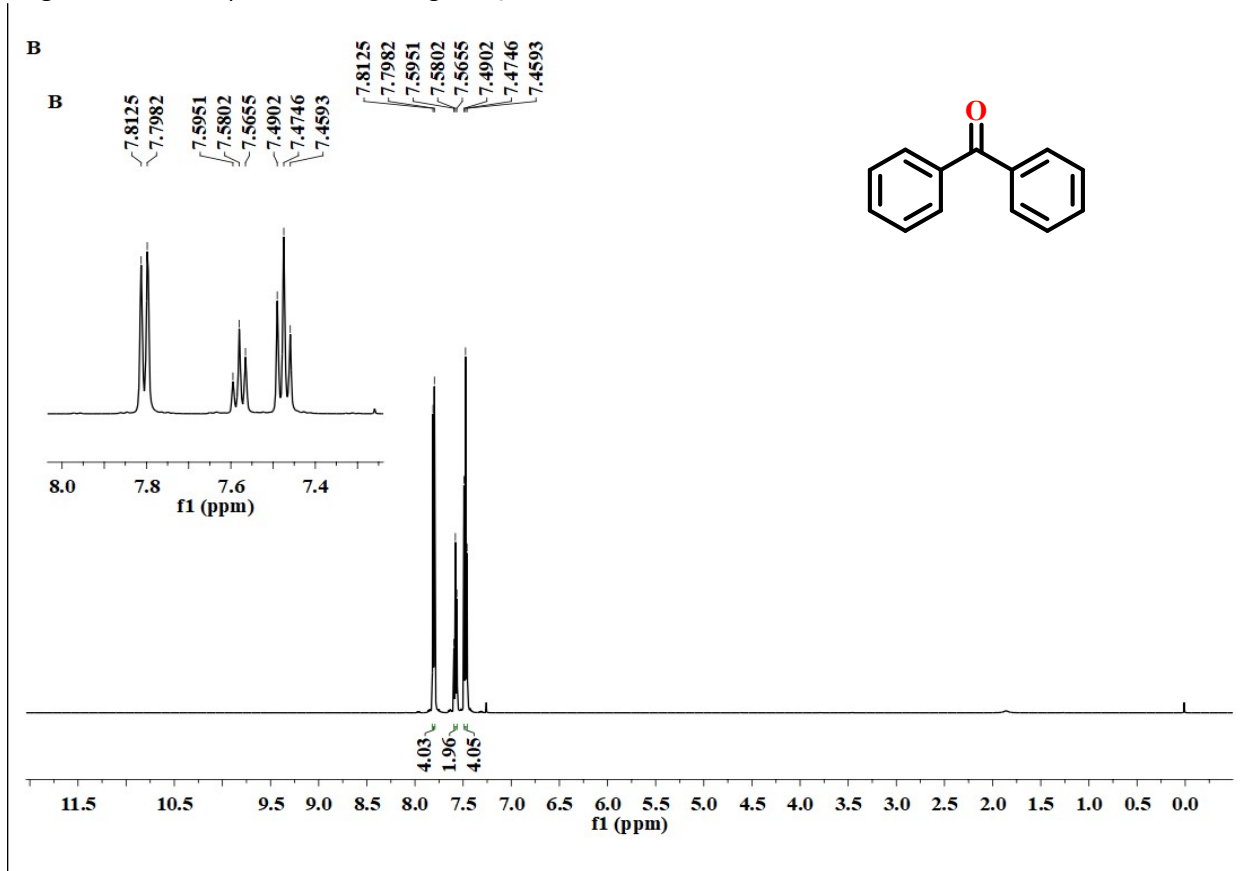

**Fig. S24.**  $^1\text{H}$  NMR spectrum of 2 taking  $\text{CDCl}_3$  as solvent.

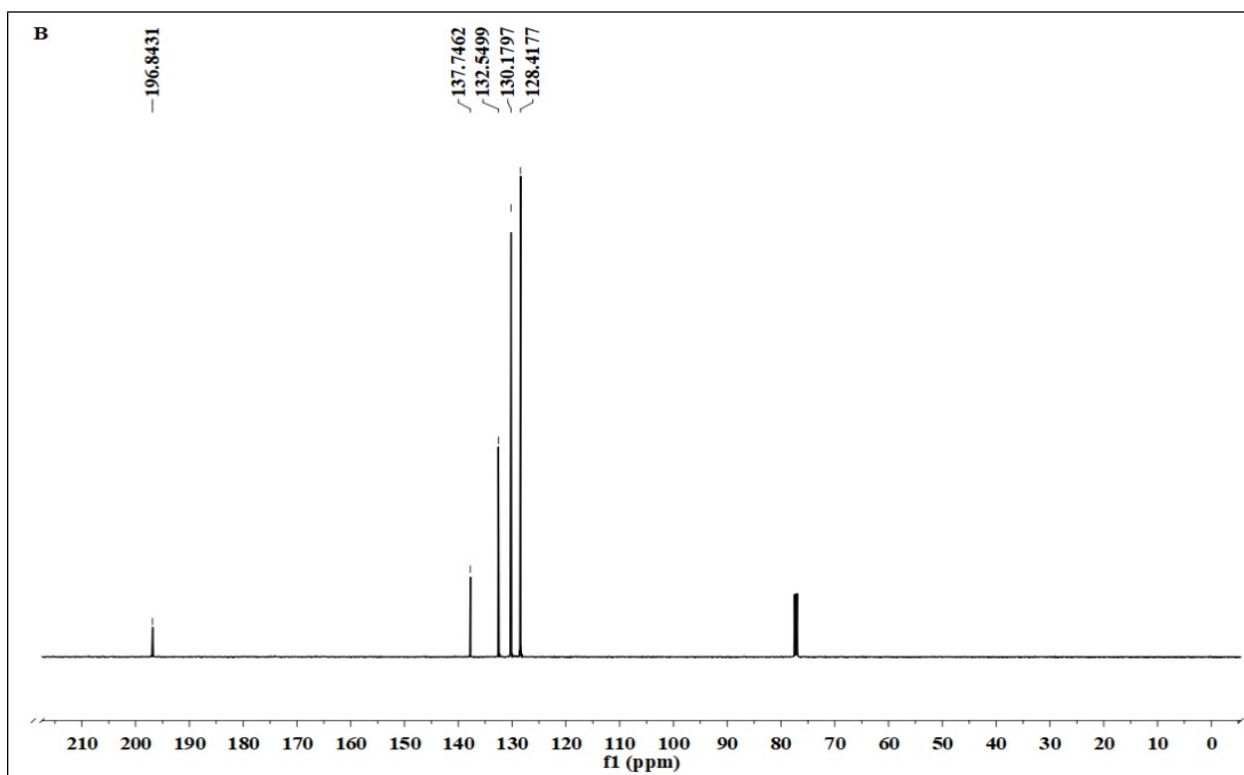

**Fig. S25.**  $^{13}\text{C}$  NMR spectrum of 2 taking  $\text{CDCl}_3$  as solvent.

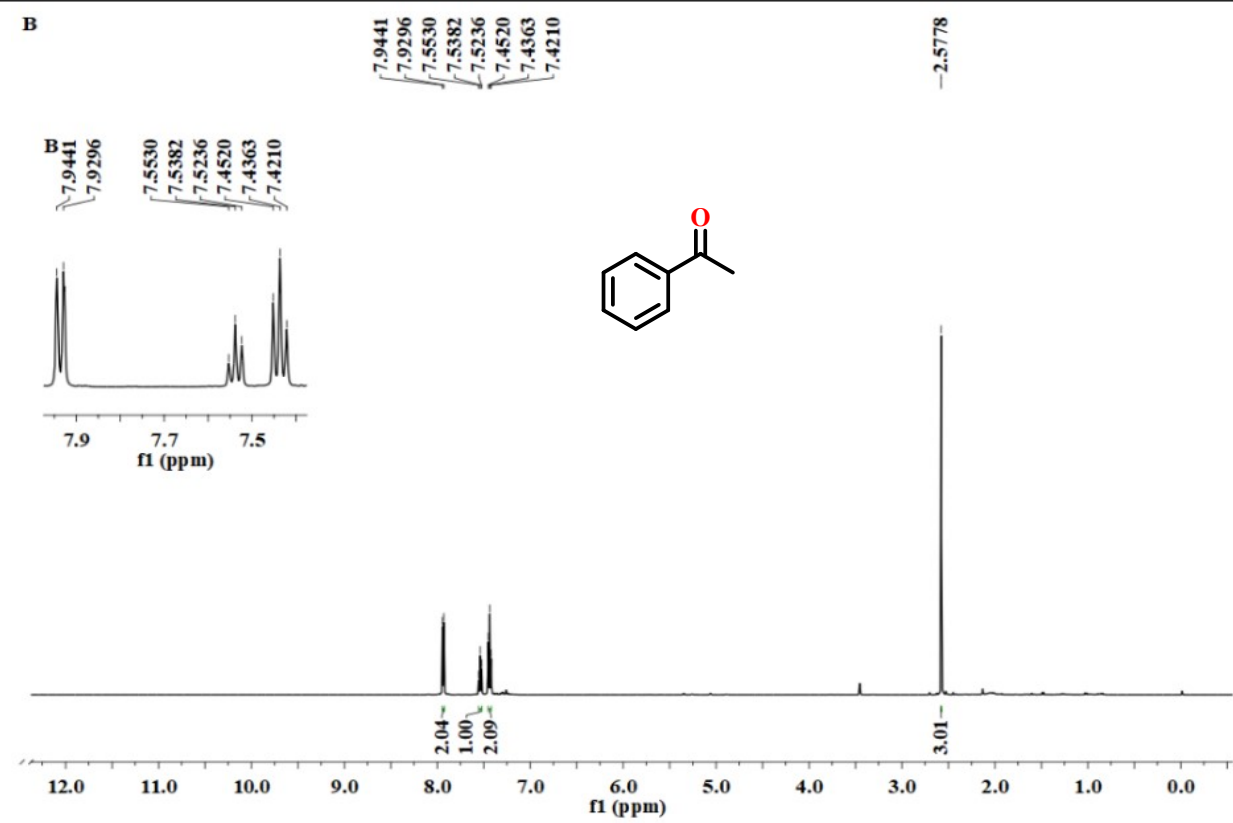

**Fig. S26.**  $^1\text{H}$  NMR spectrum of 3 taking  $\text{CDCl}_3$  as solvent.

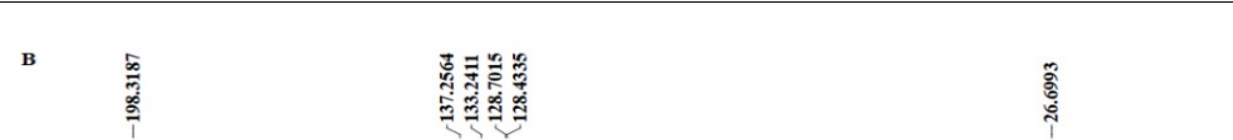

Fig. S27.  $^{13}\text{C}$  NMR spectrum of 3 taking  $\text{CDCl}_3$  as solvent.

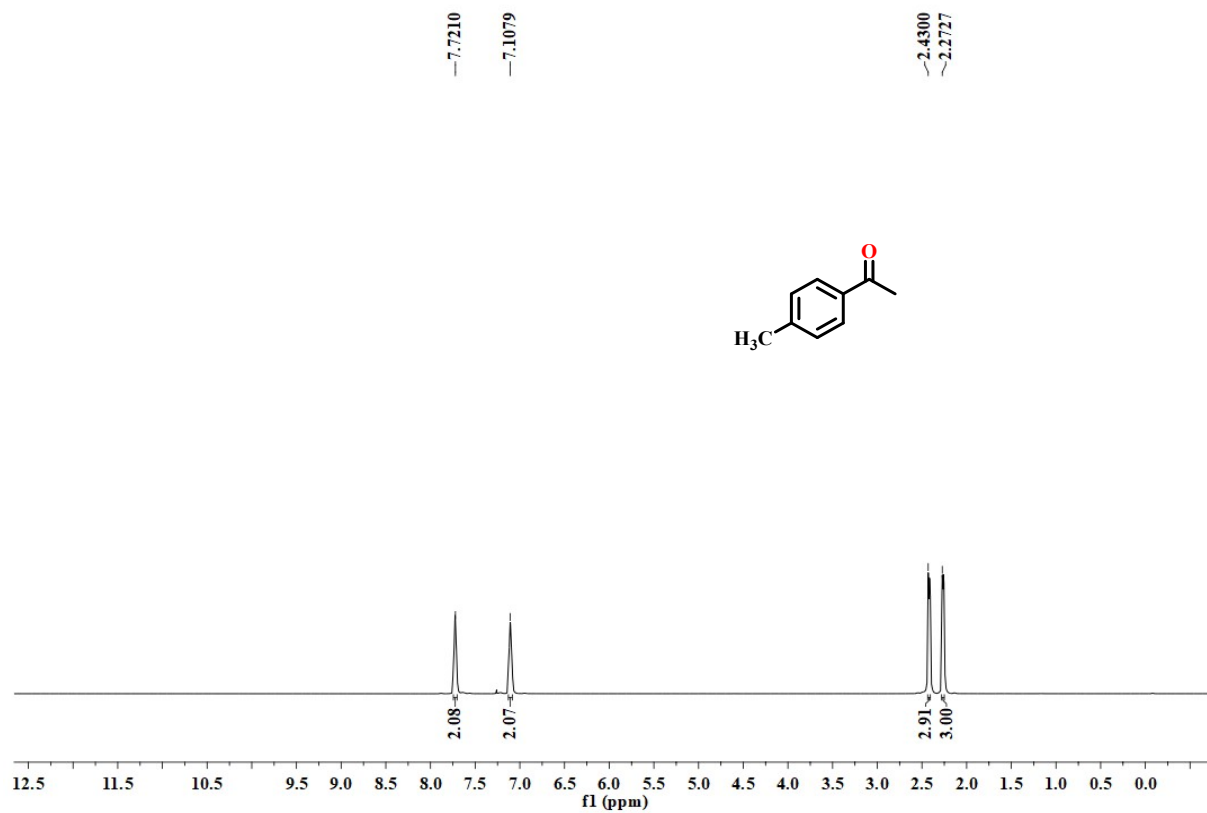

Fig. S28.  $^1\text{H}$  NMR spectrum of 4 taking  $\text{CDCl}_3$  as solvent.

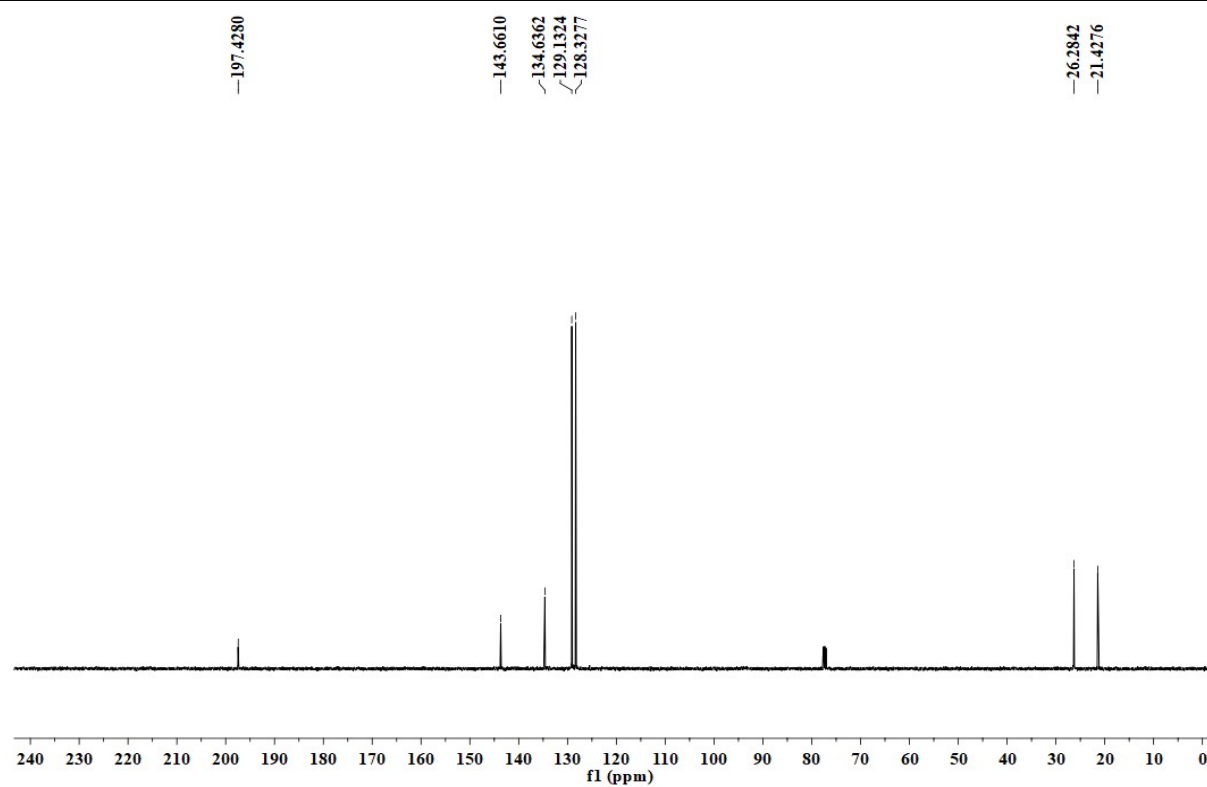

Fig. S29.  $^{13}\text{C}$  NMR spectrum of 4 taking  $\text{CDCl}_3$  as solvent.

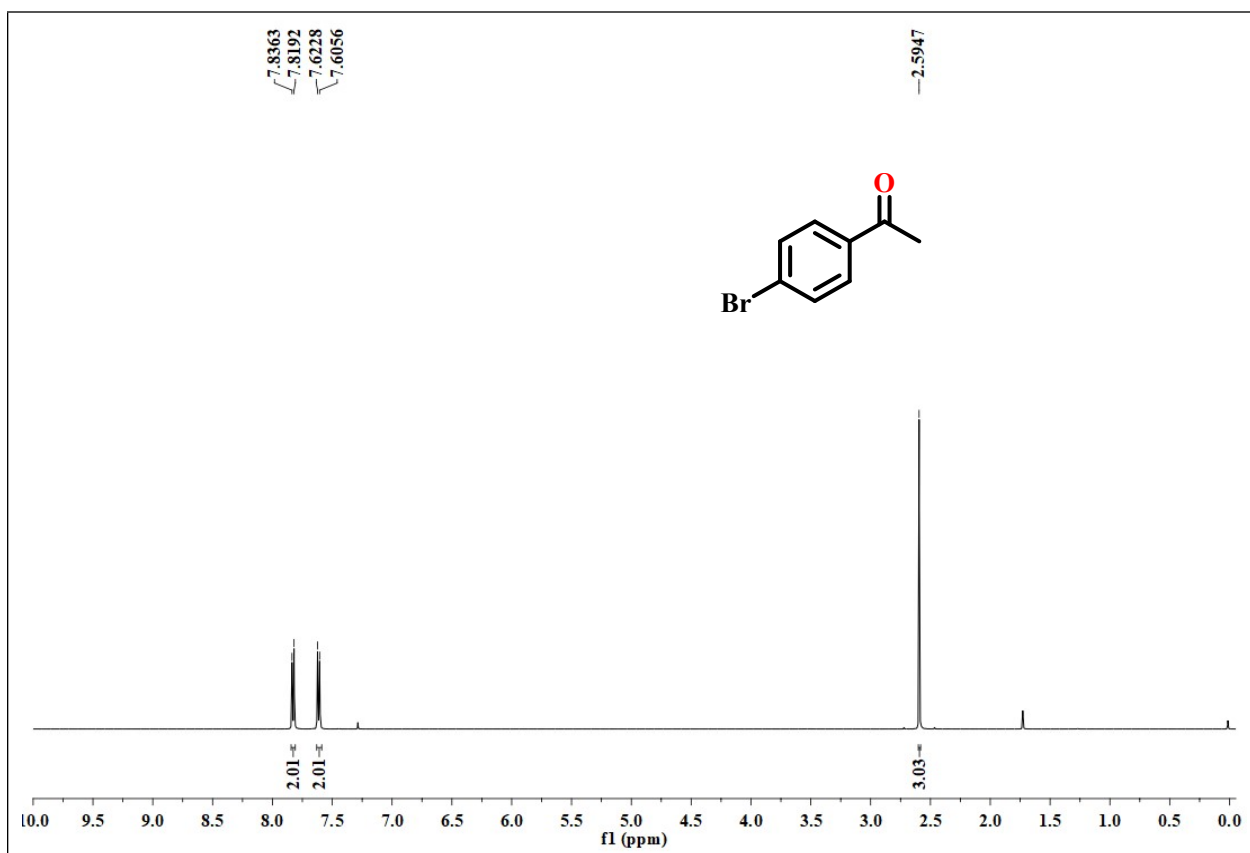

Fig. S30. <sup>1</sup>H NMR spectrum of 5 taking CDCl<sub>3</sub> as solvent.

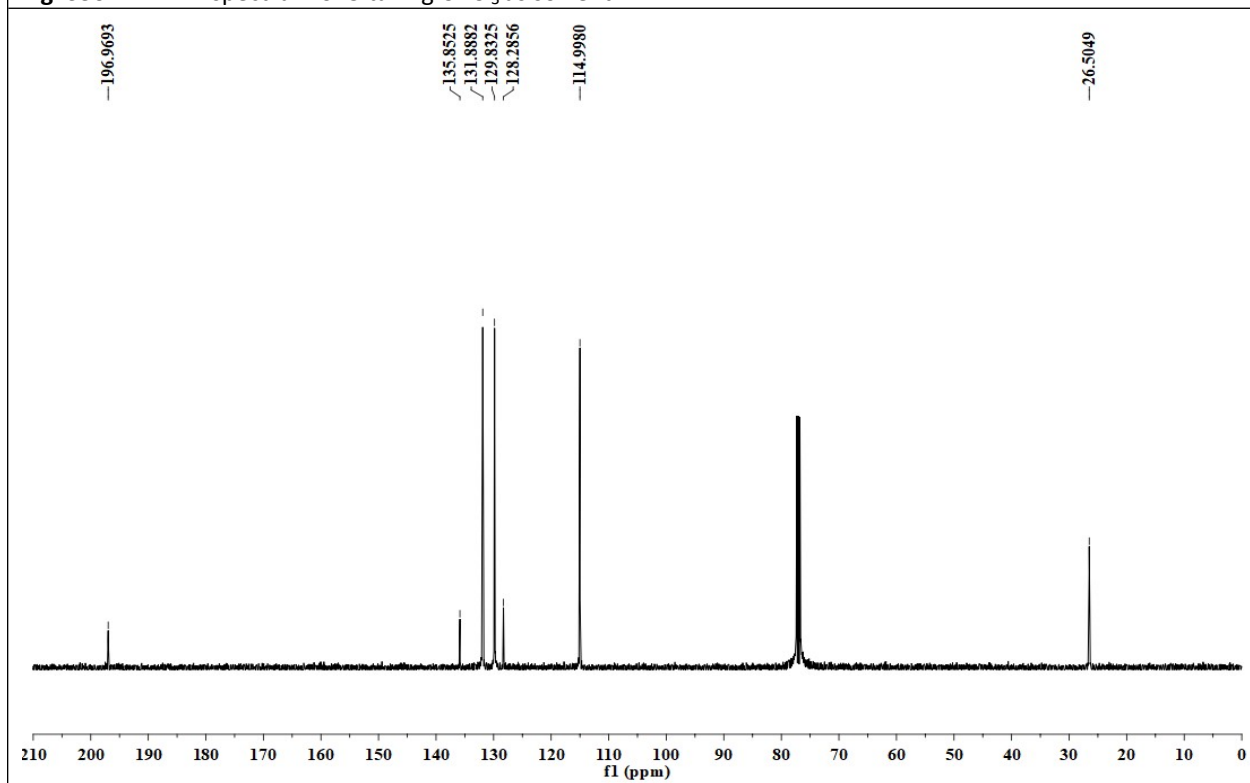

Fig. S31. <sup>13</sup>C NMR spectrum of 5 taking CDCl<sub>3</sub> as solvent.

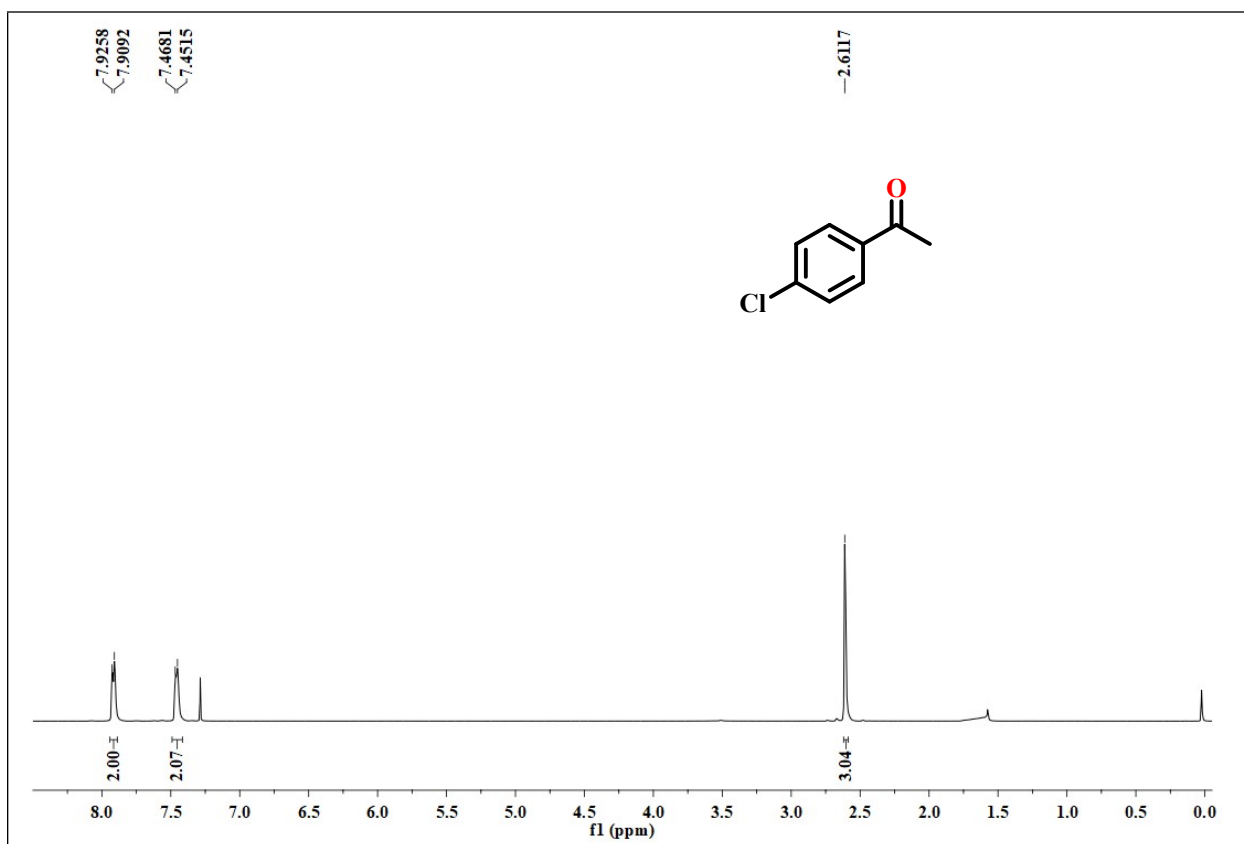

Fig. S32. <sup>1</sup>H NMR spectrum of 6 taking CDCl<sub>3</sub> as solvent.

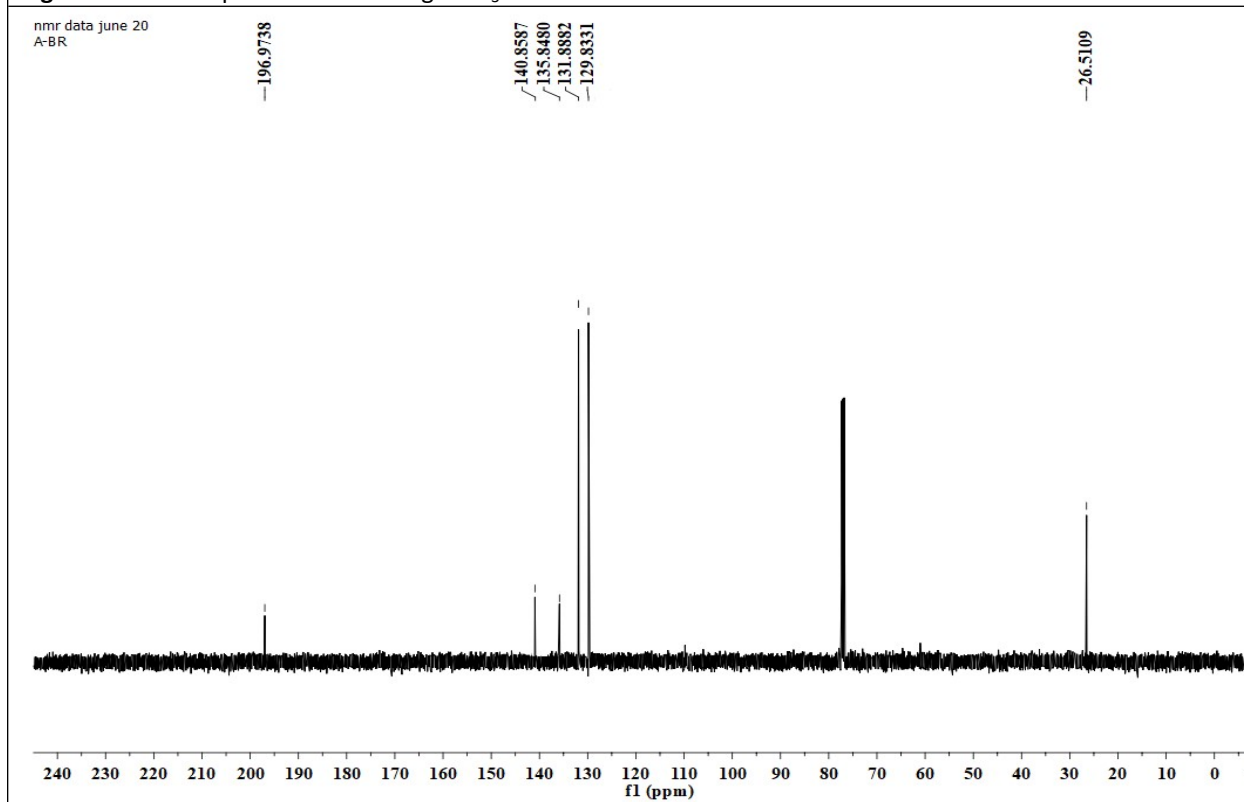

Fig. S33. <sup>13</sup>C NMR spectrum of 6 taking CDCl<sub>3</sub> as solvent.

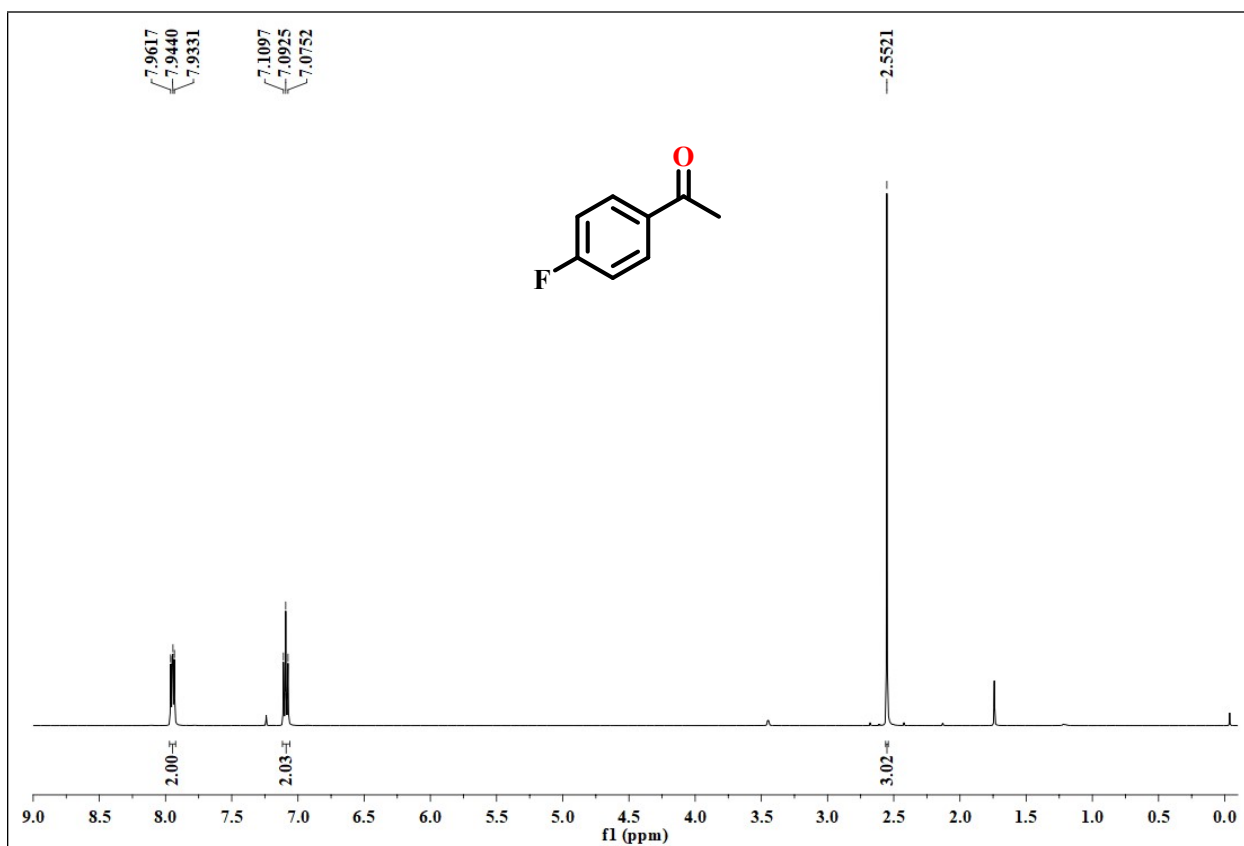

Fig. S34. <sup>1</sup>H NMR spectrum of 7 taking CDCl<sub>3</sub> as solvent.

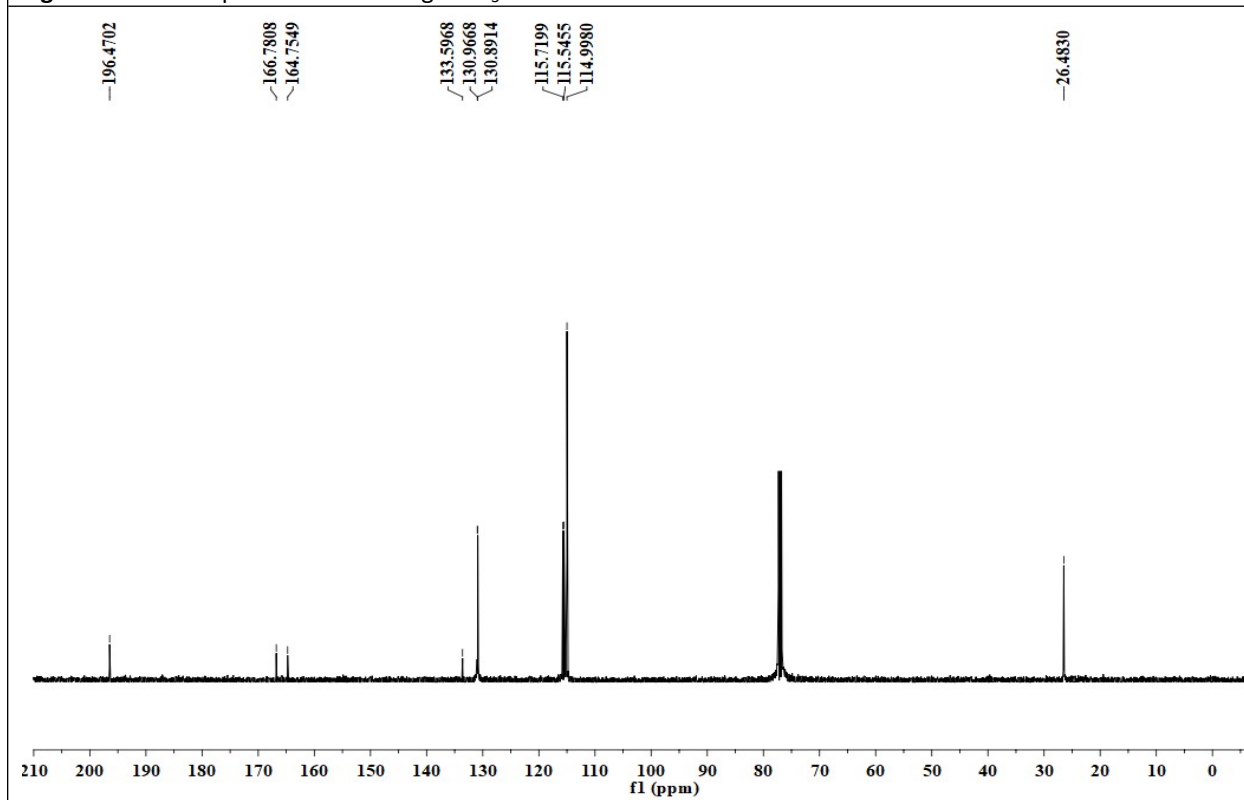

Fig. S35. <sup>13</sup>C NMR spectrum of 7 taking CDCl<sub>3</sub> as solvent.

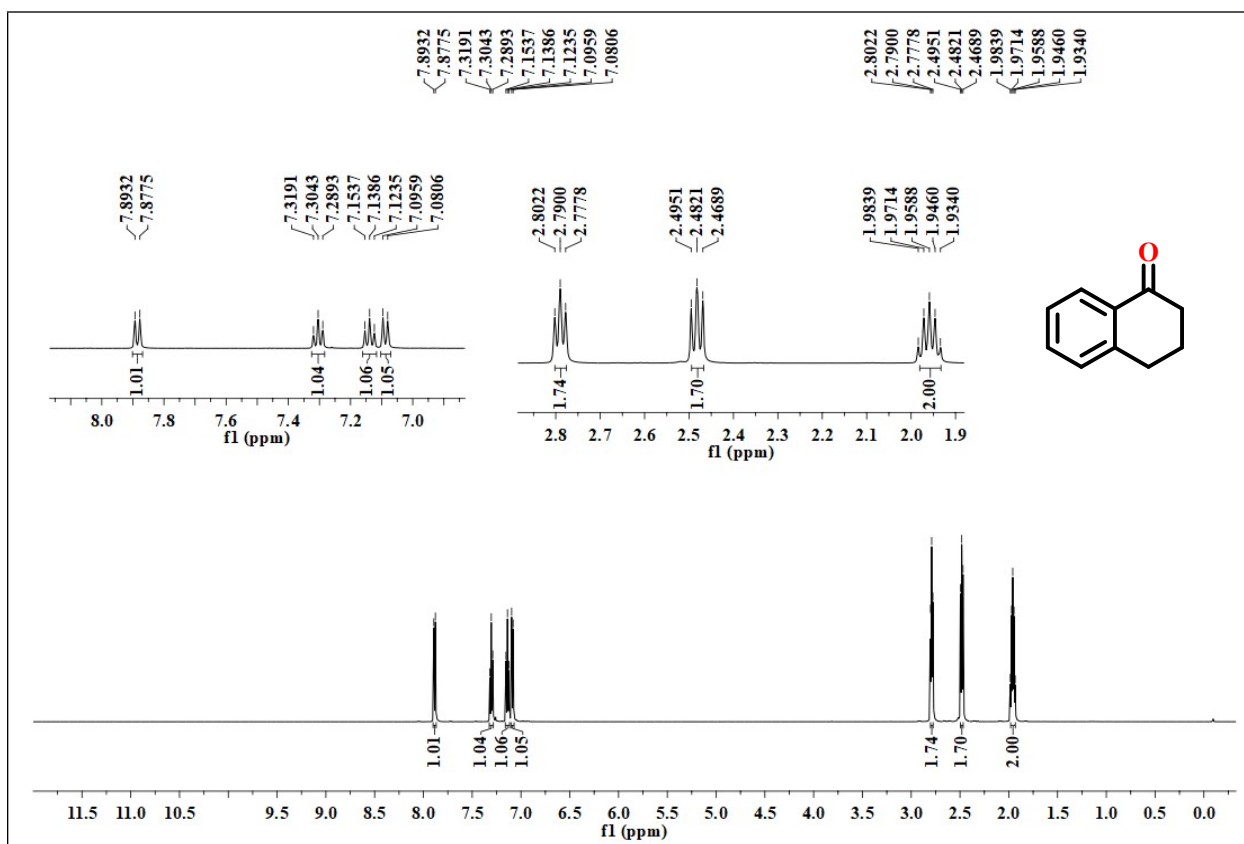

Fig. S36. <sup>1</sup>H NMR spectrum of 8 taking CDCl<sub>3</sub> as solvent.

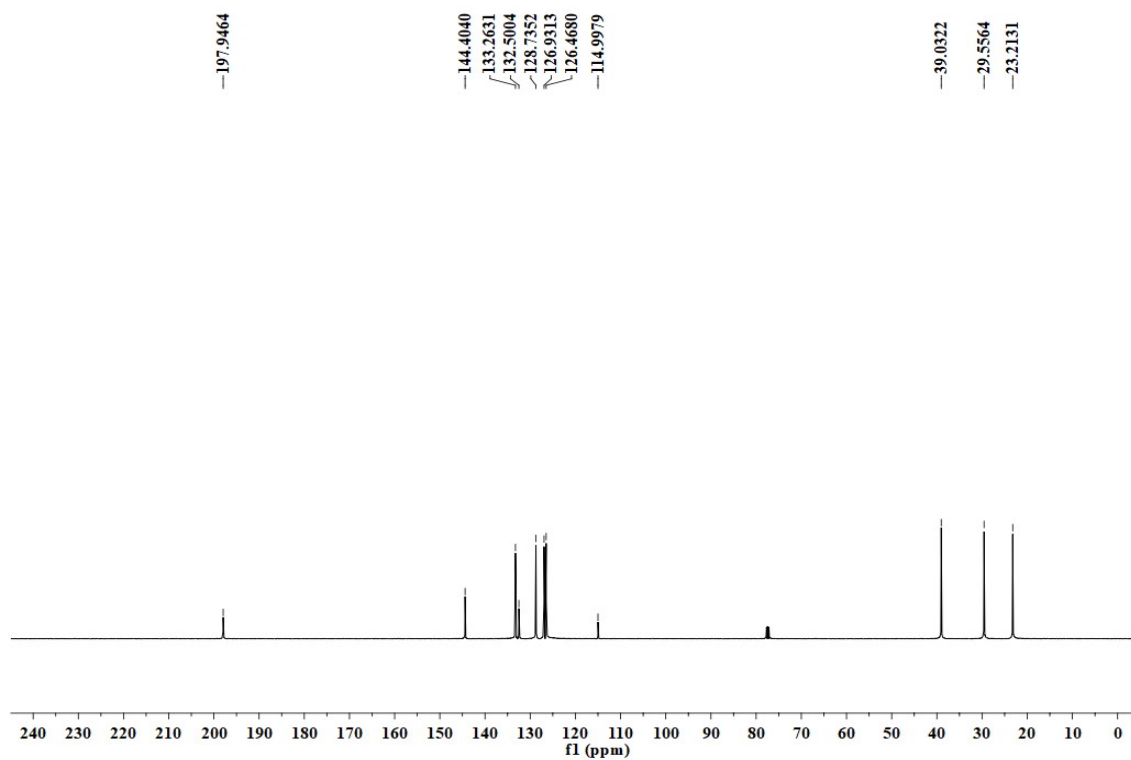

Fig. S37. <sup>13</sup>C NMR spectrum of 8 taking CDCl<sub>3</sub> as solvent.

Table S11: Data analysis for oxidation of cyclohexane<sup>a</sup>

| Complex                                                                                       | % Conversion |    | TON <sup>b</sup> | TOF(h <sup>-1</sup> ) |
|-----------------------------------------------------------------------------------------------|--------------|----|------------------|-----------------------|
|                                                                                               | A            | B  |                  |                       |
| Co <sub>2</sub> (L <sup>1</sup> )(H <sub>2</sub> O) <sub>2</sub> Cl <sub>4</sub> ( <b>1</b> ) | 20           | 15 | 5                | 0.4                   |
| Co <sub>2</sub> (L <sup>2</sup> )(H <sub>2</sub> O) <sub>2</sub> Cl <sub>4</sub> ( <b>2</b> ) | 31           | 18 | 7                | 0.6                   |

<sup>a</sup>All reactions were carried out in CH<sub>3</sub>CN at 60 °C. Cyclohexane (1 mmol), **Complex** (0.04 mmol), and TBHP (8 mmol).

% Conversion = mmole of product/ mmole of reactant

<sup>b</sup>TON = mmol of product/mmol of catalyst loading

<sup>c</sup>TOF = TON / time (in hours).

| Table S12: Data analysis for oxidation of phenylacetonitrile <sup>a</sup>                     |              |                  |                        |
|-----------------------------------------------------------------------------------------------|--------------|------------------|------------------------|
| Complex                                                                                       | % Conversion | TON <sup>b</sup> | TOF (h <sup>-1</sup> ) |
| Co <sub>2</sub> (L <sup>1</sup> )(H <sub>2</sub> O) <sub>2</sub> Cl <sub>4</sub> ( <b>1</b> ) | 51           | 13               | 1                      |
| Co <sub>2</sub> (L <sup>2</sup> )(H <sub>2</sub> O) <sub>2</sub> Cl <sub>4</sub> ( <b>2</b> ) | 48           | 12               | 1                      |

<sup>a</sup>All reactions were carried out in CH<sub>3</sub>CN at 60 °C. Phenylacetonitrile (1 mmol), **Complex** (0.04 mmol), and TBHP (8 mmol).  
 % Conversion = mmole of product/ mmole of reactant  
<sup>b</sup>TON = mmol of product/mmol of catalyst loading  
<sup>c</sup>TOF = TON / time (in hours).

| Table S13: Data analysis for oxidation of 9,10-dihydroanthracene <sup>a</sup>                 |              |                  |                        |
|-----------------------------------------------------------------------------------------------|--------------|------------------|------------------------|
| Complex                                                                                       | % Conversion | TON <sup>b</sup> | TOF (h <sup>-1</sup> ) |
| Co <sub>2</sub> (L <sup>1</sup> )(H <sub>2</sub> O) <sub>2</sub> Cl <sub>4</sub> ( <b>1</b> ) | 59           | 14               | 1.3                    |
| Co <sub>2</sub> (L <sup>2</sup> )(H <sub>2</sub> O) <sub>2</sub> Cl <sub>4</sub> ( <b>2</b> ) | 52           | 13               | 1                      |

<sup>a</sup>All reactions were carried out in CH<sub>3</sub>CN at 60 °C. 9,10-dihydroanthracene (1 mmol), **Complex** (0.04 mmol), and TBHP (8 mmol).  
 % Conversion = mmole of product/ mmole of reactant  
<sup>b</sup>TON = mmol of product/mmol of catalyst loading  
<sup>c</sup>TOF = TON / time (in hours).

| Table S14: Data analysis for oxidation of adamantane <sup>a</sup>                |              |       |                  |                        |
|----------------------------------------------------------------------------------|--------------|-------|------------------|------------------------|
| Complex                                                                          | % Conversion |       | TON <sup>b</sup> | TOF (h <sup>-1</sup> ) |
|                                                                                  | A            | B + C |                  |                        |
| Co <sub>2</sub> (L <sup>1</sup> )(H <sub>2</sub> O) <sub>2</sub> Cl <sub>4</sub> | 36           | 15    | 13               | 1                      |
| Co <sub>2</sub> (L <sup>2</sup> )(H <sub>2</sub> O) <sub>2</sub> Cl <sub>4</sub> | 28           | 13    | 10               | 0.8                    |

<sup>a</sup>All reactions were carried out in CH<sub>3</sub>CN at 60 °C. adamantane (1 mmol), **Complex** (0.04 mmol), and TBHP (8 mmol).  
 % Conversion = mmole of product/ mmole of reactant  
<sup>b</sup>TON = mmol of product/mmol of catalyst loading  
<sup>c</sup>TOF = TON / time (in hours).



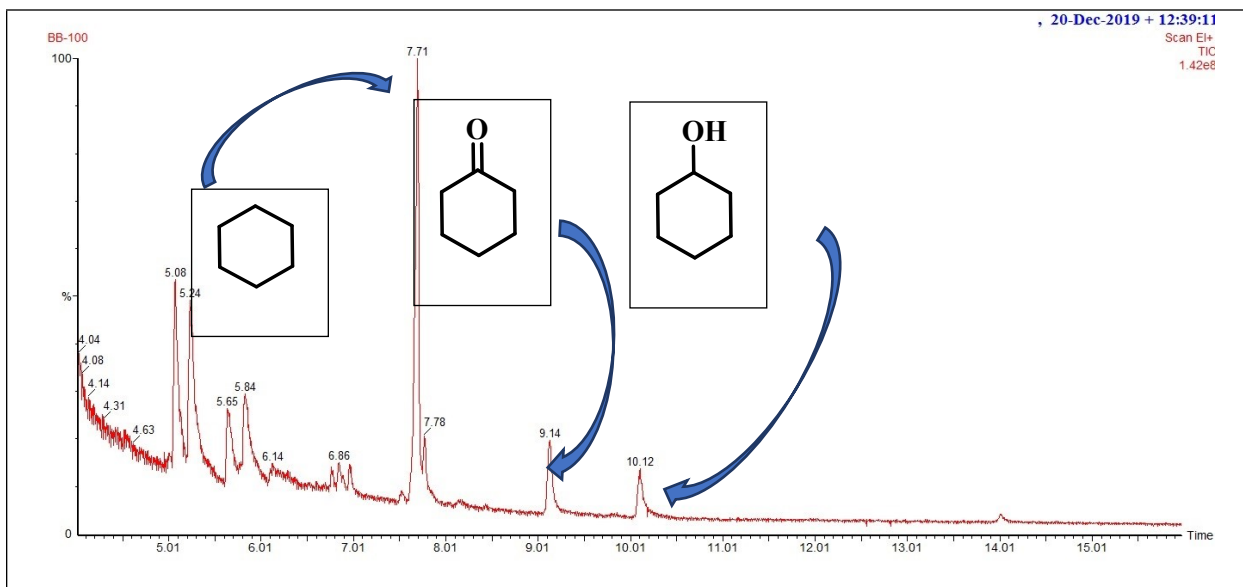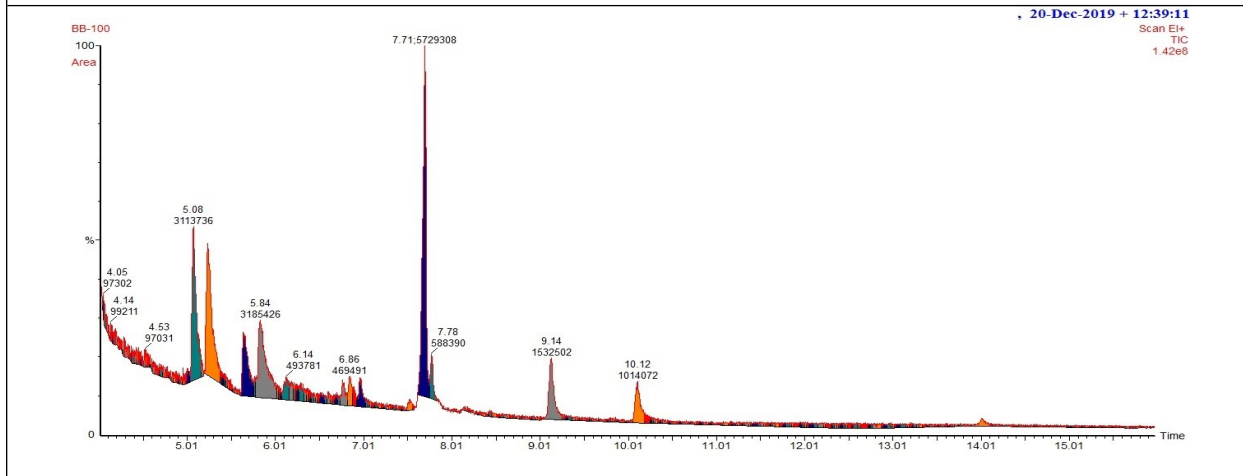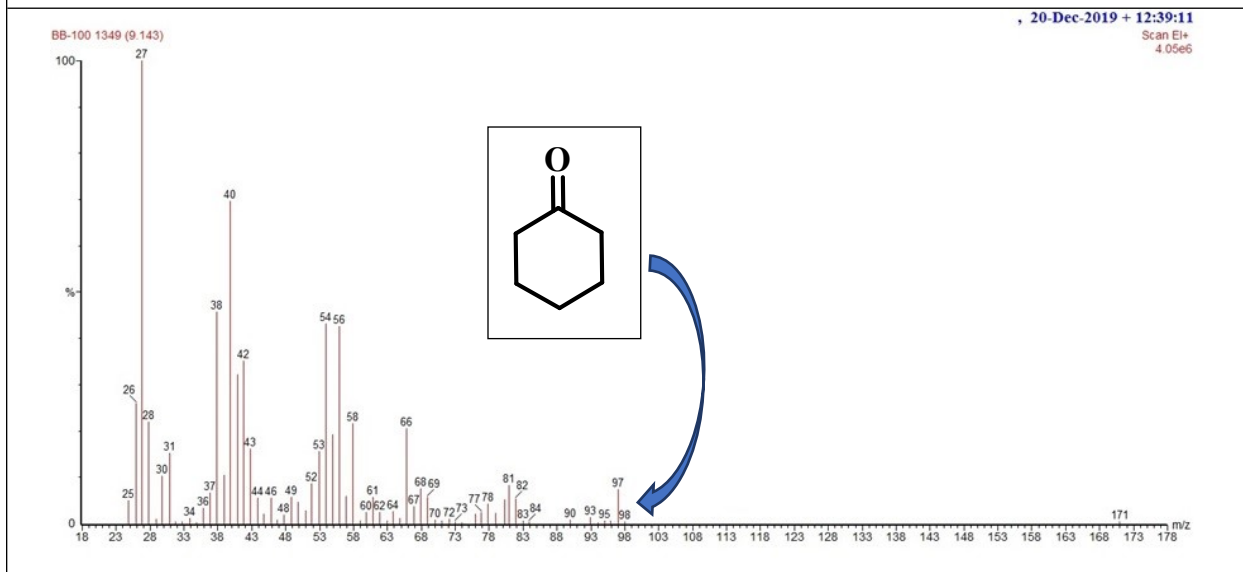

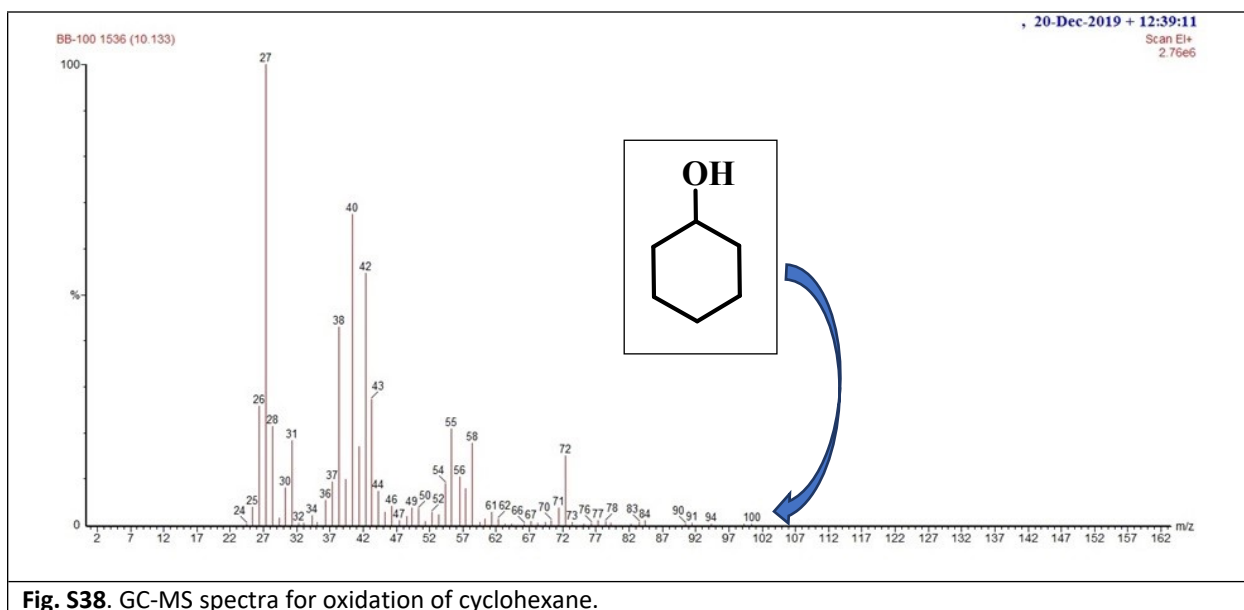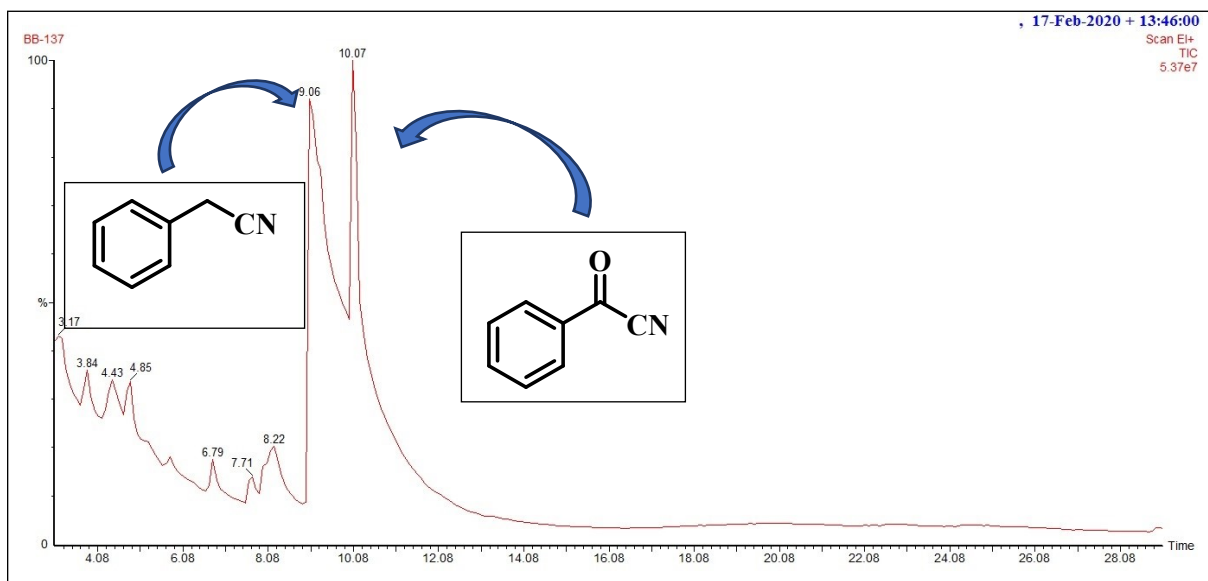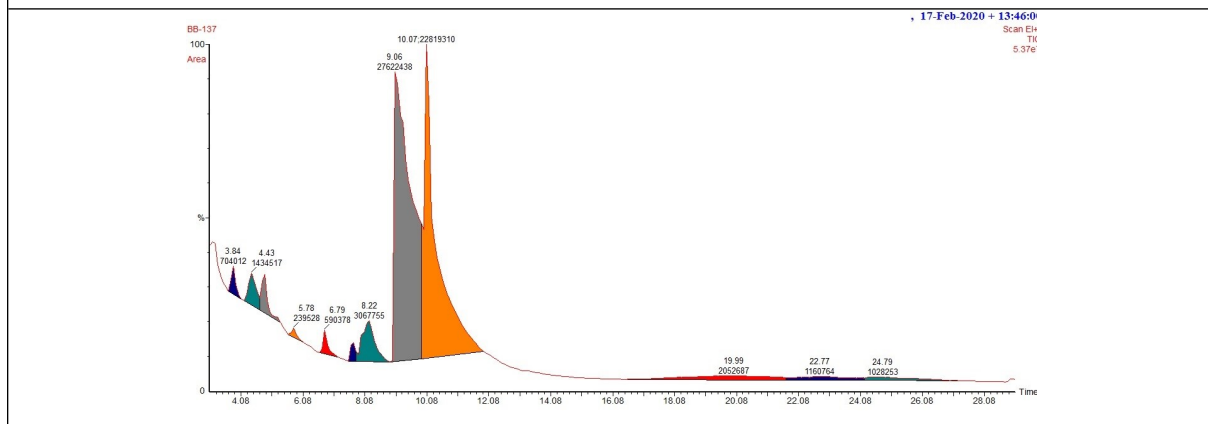

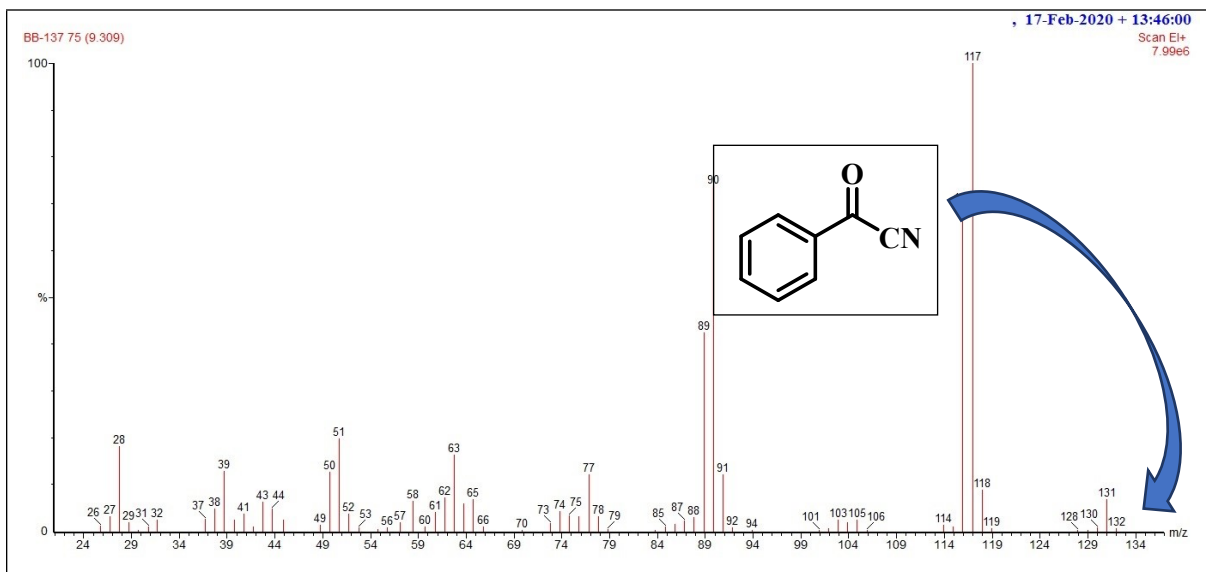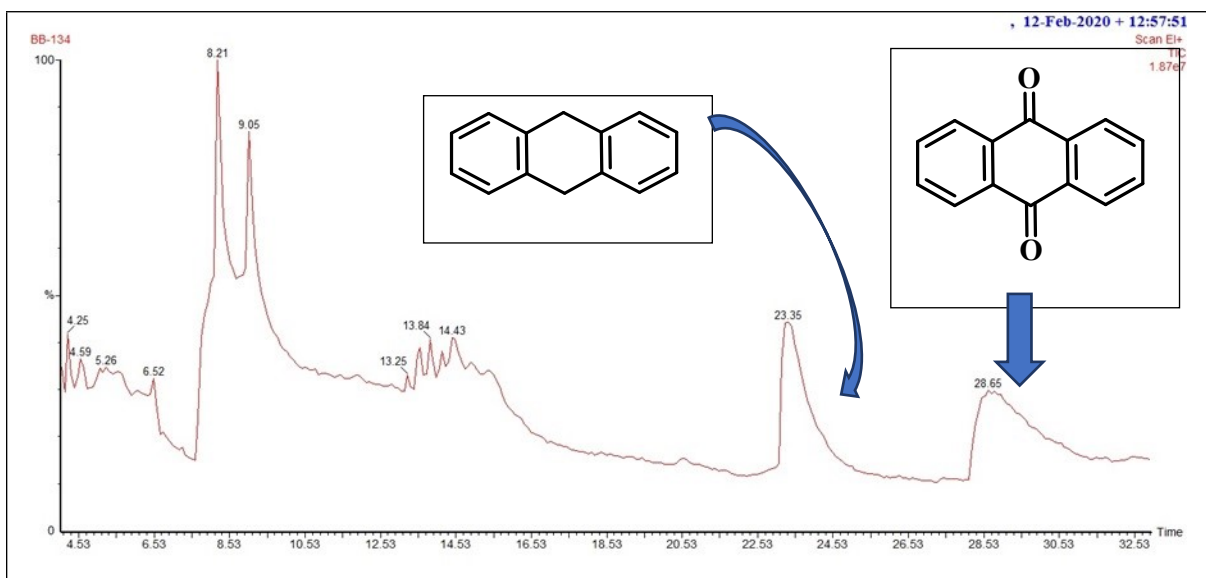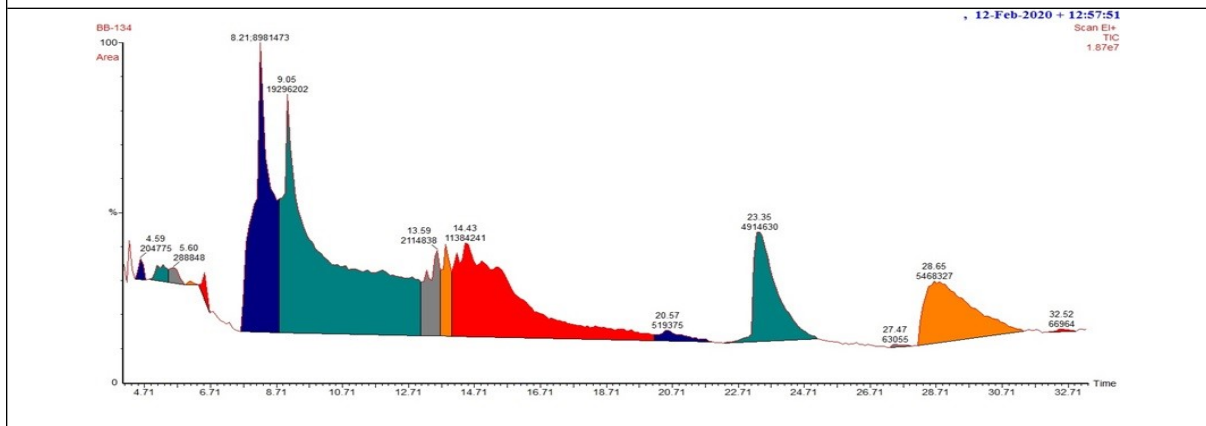

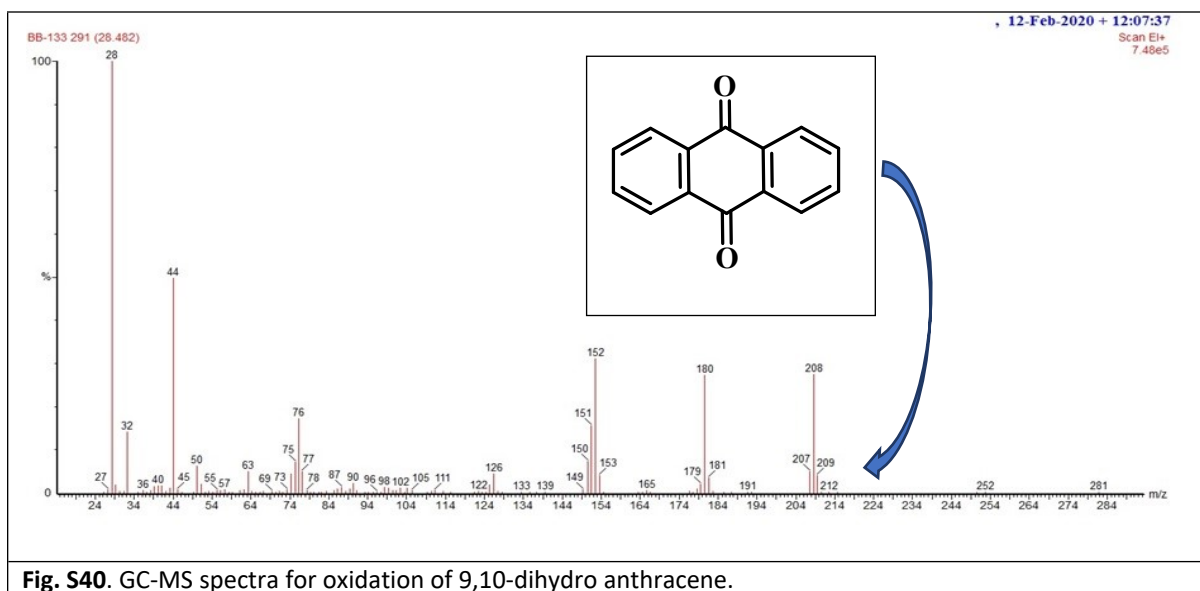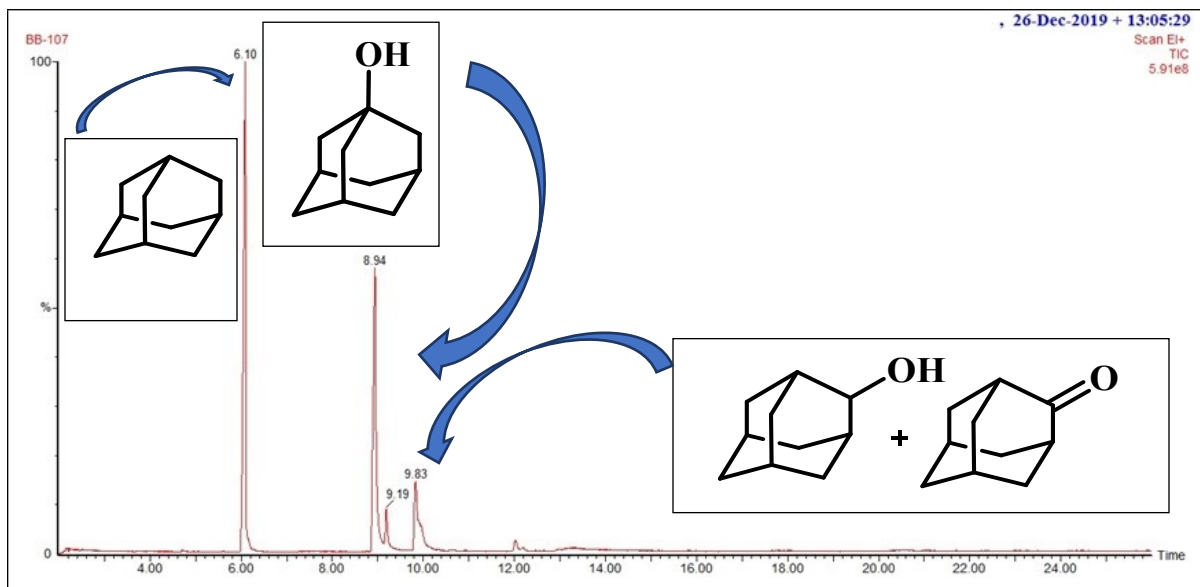



**Fig. S42:** Packing diagram of complex **1** (projection at c\*-axis).

| <b>Table S15:</b> Comparative study of literature for the oxidation of different alkanes                                 |                  |                                                  |                                |                  |
|--------------------------------------------------------------------------------------------------------------------------|------------------|--------------------------------------------------|--------------------------------|------------------|
| <b>Catalyst</b>                                                                                                          | <b>Substrate</b> | <b>Product</b>                                   | <b>% conversion or % Yield</b> | <b>Reference</b> |
| [Co(bis(imino)pyridine) (OTf) <sub>2</sub> ]<br>[Co(bis(amino)pyridine) (OTf) <sub>2</sub> ]                             | Cyclohexane      | Cyclohexanol<br>Cyclohexanone                    | 33                             | <sup>13</sup>    |
| [Cp*Co(bipy)Cl]PF <sub>6</sub><br>[Cp*Co(bipy)I]PF <sub>6</sub><br>[Cp*Co(phen)I]PF <sub>6</sub>                         | Cyclohexane      | Cyclohexanol                                     | 24                             | <sup>15</sup>    |
| [Co([PhB(Melm) <sub>3</sub> ])(acac)(MelmH)] <sup>+</sup><br>[Co([PhB(Melm) <sub>3</sub> ]) <sub>2</sub> ] <sup>+</sup>  | Cyclohexane      | Cyclohexanol<br>Cyclohexanone                    | 29                             | <sup>16</sup>    |
| <b>Complex 1</b>                                                                                                         | Cyclohexane      | Cyclohexanol<br>Cyclohexanone                    | 35                             | This work        |
| <b>Complex 2</b>                                                                                                         | Cyclohexane      | Cyclohexanol<br>Cyclohexanone                    | 39                             | This work        |
| [Co{C <sub>6</sub> H <sub>4</sub> C(NH <sub>2</sub> )NC(ONCMe <sub>2</sub> ) <sub>2</sub> } <sub>2</sub> ] <sup>2+</sup> | Adamantane       | 1-adamantanol<br>2-adamantanol<br>2-adamantanone | 66                             |                  |
| <b>Complex 1</b>                                                                                                         | Adamantane       | 1-adamantanol<br>2-adamantanol<br>2-adamantanone | 51                             | This work        |

|                                                  |                               |                                                  |    |               |
|--------------------------------------------------|-------------------------------|--------------------------------------------------|----|---------------|
| Complex 2                                        | Adamantane                    | 1-adamantanol<br>2-adamantanol<br>2-adamantanone | 41 | This work     |
| Cobalt complex supported with MCM Nano particle. | Diphenyl methane              | Benzophenone                                     | 29 | <sup>10</sup> |
| [Co(tptz)Cl <sub>2</sub> ].2H <sub>2</sub> O     | Diphenyl methane              | Benzophenone                                     | 64 | <sup>9</sup>  |
| Complex 1                                        | Diphenyl methane              | Benzophenone                                     | 72 | This work     |
| Complex 2                                        | Diphenyl methane              | Benzophenone                                     | 35 | This work     |
| [Co(tptz)Cl <sub>2</sub> ].2H <sub>2</sub> O     | Fluorene                      | Fluorenone                                       | 99 | <sup>9</sup>  |
| Complex 1                                        | Fluorene                      | Fluorenone                                       | 94 | This work     |
| Complex 2                                        | Fluorene                      | Fluorenone                                       | 91 | This work     |
|                                                  | 1,2,3,4-tetrahydronaphthalene | 3,4-dihydronaphthalen-1(2H)-one                  | 52 | <sup>14</sup> |
| Complex 1                                        | 1,2,3,4-tetrahydronaphthalene | 3,4-dihydronaphthalen-1(2H)-one                  | 80 | This work     |
| Complex 2                                        | 1,2,3,4-tetrahydronaphthalene | 3,4-dihydronaphthalen-1(2H)-one                  | 78 | This work     |
| Silica supported cobalt complexes                | Ethylbenzene                  | Acetophenone                                     | 69 | <sup>12</sup> |
| Complex 1                                        | Ethylbenzene                  | Acetophenone                                     | 79 | This work     |
| Complex 2                                        | Ethylbenzene                  | Acetophenone                                     | 75 | This work     |
| Silica supported cobalt complexes                | 1-bromo-4-ethylbenzene        | 1-(4-bromophenyl)ethan-1-one                     | 75 | <sup>12</sup> |
| Complex 1                                        | 1-bromo-4-ethylbenzene        | 1-(4-bromophenyl)ethan-1-one                     | 82 | This work     |
| Complex 2                                        | 1-bromo-4-ethylbenzene        | 1-(4-bromophenyl)ethan-1-one                     | 78 | This work     |
| Silica supported cobalt complexes                | 1-chloro-4-ethylbenzene       | 1-(4-chlorophenyl)ethan-1-one                    | 76 | <sup>12</sup> |
| Complex 1                                        | 1-chloro-4-ethylbenzene       | 1-(4-chlorophenyl)ethan-1-one                    | 79 | This work     |
| Complex 2                                        | 1-chloro-4-ethylbenzene       | 1-(4-chlorophenyl)ethan-1-one                    | 73 | This work     |

## References

- 1 K. Ghosh, V. Mohan, P. Kumar, S. W. Ng and E. R. T. Tiekink, *Inorg. Chim. Acta*, 2014, **416**, 76–84.
- 2 Y. Chen, R. Chen, C. Qian, X. Dong and J. Sun, *Organometallics*, 2003, **22**, 4312–4321.
- 3 S. H. Ahn, S. Il Choi, M. J. Jung, S. Nayab and H. Lee, *J. Mol. Struct.*, 2016, **1113**, 24–31.

- 4 C. Moyses Araujo, M. D. Doherty, S. J. Konezny, O. R. Luca, A. Usyatinsky, H. Grade, E. Lobkovsky, G. L. Soloveichik, R. H. Crabtree and V. S. Batista, *Dalton Trans.*, 2012, **41**, 3562–3573.
- 5 K. Ghosh, V. Mohan, P. Kumar and U. P. Singh, *Polyhedron*, 2013, **49**, 167–176.
- 6 S. H. Ahn, S. Il Choi, M. J. Jung, S. Nayab and H. Lee, *J. Mol. Struct.*, 2016, **1113**, 24–31.
- 7 A. Abu Shamma, H. Abu Ali and S. Kamel, *Appl. Organomet. Chem.*, 2018, **32**, 1–12.
- 8 J. Drzeżdżon, J. Malinowski, A. Sikorski, B. Gawdzik, P. Rybiński, L. Chmurzyński and D. Jacewicz, *Polyhedron*, 2020, **175**, 1–10.
- 9 Z. Azarkamanzad, F. Farzaneh, M. Maghami and J. Simpson, *New J. Chem.*, 2019, **43**, 12020–12031.
- 10 S. S. Bhoware, K. R. Kamble and A. P. Singh, *Catal. Letters*, 2009, **133**, 106–111.
- 11 O. V. Nesterova, M. N. Kopylovich and D. S. Nesterov, *RSC Adv.*, 2016, **6**, 93756–93767.
- 12 F. Rajabi, R. Luque, J. H. Clark, B. Karimi and D. J. MacQuarrie, *Catal. Commun.*, 2011, **12**, 510–513.
- 13 G. J. P. Britovsek, J. England, S. K. Spitzmesser, A. J. P. White and D. J. Williams, *Dalton Trans.*, 2005, 945–955.
- 14 A. N. Kharat, B. T. Jahromi and A. Bakhoda, *Transit. Met. Chem.*, 2012, **37**, 63–69.
- 15 G. B. Shul'pin, D. A. Loginov, L. S. Shul'pina, N. S. Ikonnikov, V. O. Idrisov, M. M. Vinogradov, S. N. Osipov, Y. V. Nelyubina and P. M. Tyubaeva, *Molecules*, 2016, **21**, 1–17.
- 16 T. Nishiura, A. Takabatake, M. Okutsu, J. Nakazawa and S. Hikichi, *Dalton Trans.*, 2019, **48**, 2564–2568.
